# Transcriptomic correlates of state modulation in GABAergic interneurons: A cross-species analysis

Joram Keijser<sup>1,2,#</sup>, Loreen Hertäg<sup>1</sup>, Henning Sprekeler<sup>1,3</sup>

1. Modelling of Cognitive Processes, Technical University of Berlin, 10587, Berlin, Germany

2. Charité – Universitätsmedizin Berlin, Einstein Center for Neurosciences Berlin, 10117, Berlin, German

3. Bernstein Center for Computational Neuroscience Berlin, 10115, Berlin, Germany

# Corresponding author (keijser@tu-berlin.de)

## Abstract

GABAergic inhibitory interneurons comprise many subtypes that differ in their molecular, anatomical and functional properties. In mouse visual cortex, they also differ in their modulation with an animal's behavioural state, and this state modulation can be predicted from the first principal component (PC) of the gene expression matrix. Here, we ask whether this link between transcriptome and state-dependent processing generalises across species. To this end, we analysed seven single-cell and single-nucleus RNA sequencing datasets from mouse, human, songbird, and turtle forebrains. Despite homology at the level of cell types, we found clear differences between transcriptomic PCs, with greater dissimilarities between evolutionarily distant species. These dissimilarities arise from two factors: divergence in gene expression within homologous cell types and divergence in cell type abundance. We also compare the expression of cholinergic receptors, which are thought to causally link transcriptome and state modulation. Several cholinergic receptors predictive of state modulation in mouse interneurons are differentially expressed between species. Circuit modelling and mathematical analyses delineate the conditions under which these expression differences could translate into functional differences.

## 21 Introduction

22 GABAergic inhibitory interneurons are a highly diverse population consisting of multiple cell types [1, 2]. In  
23 recent years, single-cell RNA sequencing (scRNA-seq [3]) has revealed that these types can be further subdivided  
24 into tens of subtypes [4, 5, 6] that also differ in their morphological and electrophysiological properties [7, 8]. So  
25 far, it has been difficult to understand the functional relevance of this fine-grained diversity. Bugeon et al. [9]  
26 recently bridged this gap by revealing that interneurons show subtype-specific modulation with an animal's  
27 behavioural state, at least in layers 1-3 of mouse primary visual cortex (VISp). Strikingly, this state modulation  
28 could be predicted from the first transcriptomic principal component (tPC1). An interneuron's tPC1 score also  
29 correlated with other dimensions of interneuron diversity, such as electrophysiology and connectivity, hinting at  
30 an "approximate but general principle" of mouse cortical interneurons [9].

31 Intrigued by these findings, we wondered how general the principle embodied by tPC1 actually is (Fig. 1).  
32 Are transcriptomic correlates of state modulation similar across different species, or at least across mouse  
33 cortical layers and areas? If yes, this similarity would suggest conserved principles; if no, the difference could  
34 reveal distinct solutions to shared computational problems [10, 11, 12]. The uniformity of interneurons in the  
35 mouse brain [6] suggests that their gene expression and state modulation patterns observed in VISp might apply  
36 generally. In fact, earlier work by the authors of ref. [9] found that hippocampal interneurons are also organized  
37 along a single latent factor [13]. Similarly, recent comparative transcriptomic analyses have emphasized the  
38 conservation of (cortical) inhibitory interneurons across mammals [14, 15, 16, 17], and more distantly related  
39 species [18, 19, 20]. But these and other studies [21, 22] have also discovered species-specific interneuron  
40 subtypes. Additionally, the relative proportions of interneuron types vary even across mouse cortex [23, 24], as  
41 does the modulation of interneurons with brain state [25, 26, 27, 28].

42 We therefore investigated the transcriptomic correlates of state modulation in seven existing single-cell  
43 RNA-seq (scRNA-seq) and single-nucleus RNA-seq (snRNA-seq) datasets from the forebrains of mice [9, 6, 29],  
44 humans [14, 15], turtles [18], and songbirds [19]. These species each have homologous types of inhibitory  
45 interneurons, but their evolutionary history and brain organization vary in important ways. For example,  
46 humans are evolutionarily closest to mice, turtles also have a (three-layered) cortex with potentially different  
47 evolutionary origins [30, 31, 18], and songbirds lack a cortex altogether [32, 33, 34].

48 We found that transcriptomic PCs show relatively minor differences across smaller evolutionary distances  
49 (e.g., between mice and humans) but diverge over longer evolutionary time scales (e.g., mice and turtles).  
50 Between-species differences dwarf within-species differences, likely due to biological rather than technical rea-  
51 sons. Specifically, we trace differences in tPCs to species-specific cell type abundances and within-type gene  
52 expression patterns. We also find a combination of conservation and divergence in the expression of the cholinergic  
53 receptors correlated with state modulation in mice [9]. Circuit modelling predicts the connectivity patterns  
54 for which differences in receptor expression translate into species-specific state modulation of interneurons and  
55 cortical information flow.

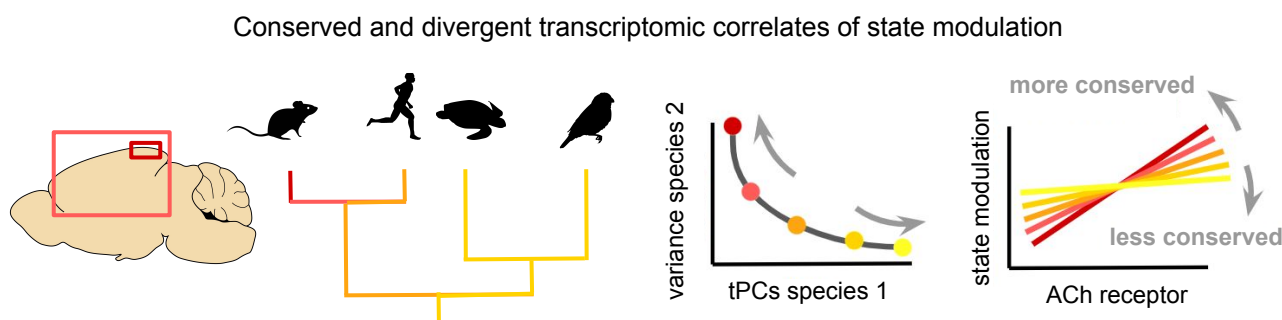

**Figure 1:** Schematic of our main question: could the same transcriptomic axis predict state modulation in other layers and areas of the mouse cortex and in other species? We investigate this by comparing transcriptomic principal components (tPCs) and cholinergic (ACh) receptor expression across RNA-seq datasets [9, 15, 19, 14, 6, 18, 29].

## 56 Results

57 We first validated our analysis pipeline by replicating the relevant results from Bugeon et al. [9] on their data  
58 and conducting several additional analyses. Briefly, we reproduced the systematic variation of interneuron  
59 subtypes with behavioural state (roughly, running vs stationary) and its correlation with tPC1 (Fig. S1). This

60 correlation seems driven by differences within and across cell types [35] and is strongest within the Pvalb and  
61 Sst populations (Fig. S2). Whether interneurons form a continuum or cluster along tPC1 depends on the  
62 preprocessing of the transcriptomic data (Fig. S3). These caveats aside, our analyses are consistent with those  
63 from Bugeon et al. and might reveal similar patterns—or the lack thereof—in other brain areas and species. A  
64 detailed description of the replication can be found in the supplementary material (see Replication of Bugeon  
65 et al).

## 66 Conserved and divergent transcriptomic axes across species

67 Having validated our approach on mouse data, we next turn to the cross-species comparison using transcriptomic  
68 data from humans (*Homo sapiens*, [15]), turtles (*Trachemys scripta elegans*, [18]), and zebra finch (*Taeniopygia*  
69 *guttata*, [19]); see Table 1 for an overview of all analysed datasets. We compare these data with a large reference  
70 dataset from mouse VISp [6].

71 We first visualized the data from different species. To this end, we preprocessed the datasets using the same  
72 analysis pipeline and applied PCA to the resulting RNA count matrices (see Methods). The projection onto the  
73 first 2 tPCs of the human, but not turtle or zebra finch data, was similar to that of the mouse data (Fig. 2a).  
74 Mouse and human interneurons clustered by developmental area [36], with medial ganglionic eminence (MGE)-  
75 born Pvalb and Sst cells occupying one side of tPC1, and caudal ganglionic eminence (CGE)-born Lamp5, Vip,  
76 and Sncg cells the other. An intermediate position was occupied by a small group of Meis2 neurons [6], located  
77 in the white matter [37]. In contrast to the mammalian datasets, the turtle and finch data were characterised  
78 by a large population of Meis2-positive neurons (Fig. 2a, Table 2). Transcriptomic and morphological evidence  
79 suggests that these cells are likely homologous to neurons in the mammalian striatum rather than the white  
80 matter [18, 19].

81 We quantified these visual differences using the principal angles, which generalise the notion of angle between  
82 two lines in a plane (Fig. 2b; see Methods). Here, we computed the angles between subspaces spanned by each  
83 dataset's top 30 PCs. Consistent with the impression from the first 2 PCs, the principal angles were the  
84 smallest between mouse and human subspaces (Fig. 2c). Turtle and zebra finch PCs were both dissimilar to  
85 mouse PCs. Principal angles do not require a one-to-one relationship between individual principal components  
86 but also do not consider the variance explained by these components. For instance, a pair of highly similar  
87 but low-variance dimensions will result in small principal angles—inadvertently suggesting high similarity. We  
88 therefore performed a complementary analysis by computing the variance in the mouse data explained by the  
89 PCs of other datasets (Fig. 2d). The first human PC accounted for 15% of the variance explained by the first  
90 mouse PC; the turtle and songbird tPC1 accounted for 1.2% and 4.5%, respectively (Fig. 2e). Each tPC1  
91 explained more variance than a random direction (0.3%), consistent with some shared global structure.

92 We confirmed that these results were not due to technical differences in the different datasets. We first  
93 controlled for sequencing depth using a subsampling procedure (Fig. S4, Methods). We also mapped each  
94 dataset onto the mouse data using anchor-based integration [38]. This method has been widely used in cross-  
95 species analyses (e.g., [14, 19, 39, 40]). As expected, computational integration increased the similarity among  
96 the datasets (Fig. S5), but the larger similarity between human and mouse data was preserved.

97 How might the transcriptomic differences relate to state modulation? Because state modulation information  
98 was only available for the mouse [9], we projected this data onto the tPCs from other datasets to determine their  
99 predictive ability (Fig. 2f). We found that the human tPC1 predicts state modulation in the mouse ( $R^2 = 0.18$ ),  
100 but the turtle tPC1 did not ( $R^2 = 0$ ) (Fig. 2g; compare with Fig. S1). The zebra finch tPC1 showed a weak  
101 but significant ability to predict state modulation ( $R^2 = 0.07$ ). We conclude that human tPCs are similar to  
102 those of the mouse also on a functional level, in line with evolutionary history.

103 What evolutionary changes underlie the differences between transcriptomic PCs? At least two non-mutually  
104 exclusive processes are possible. First, homologous subclasses could evolve in a species-dependent manner, as  
105 indicated by differences in gene expression. Second, evolution can also change the relative abundance of other-  
106 wise conserved classes [15, 41]. We wondered if the relative abundance of cell classes was sufficient to explain the  
107 species differences. To this end, we resampled cells to equal fractions, such that the 3 classes (Pvalb, Sst, Vip)  
108 present in all datasets each accounted for one-third of the cells (Fig. 2h). This increased the visual similarity  
109 between the first two tPCs of the mammalian and non-mammalian datasets due to the absence of Meis2 neurons  
110 (Fig. S6). Still, the matched-abundance datasets were as dissimilar as the original datasets (Figs. 2j, S7). This  
111 highlights the divergence of homologous cell types as a driver of evolutionary change in the global transcriptomic  
112 landscape.

## 114 Similar transcriptomic axes across mouse datasets

115 The previous cross-species comparison is based on data collected with different sequencing protocols and from  
116 different brain areas. To account for these factors, we calibrated the between-species differences against within-

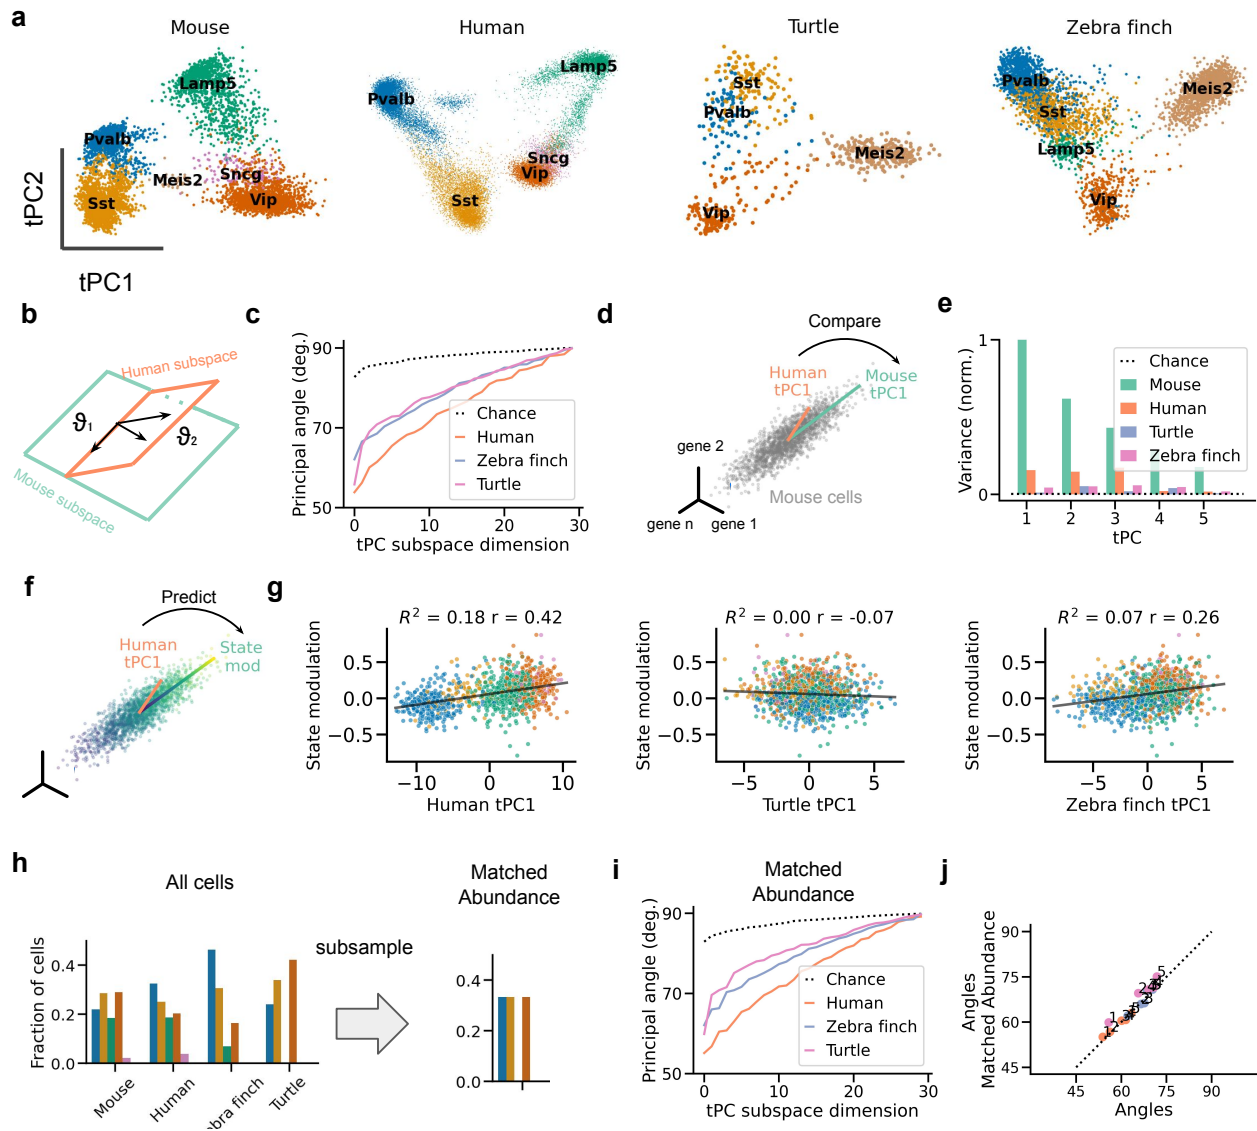

**Figure 2: Transcriptomic PCs capture conserved and divergent global gene expression patterns.**

(a) Projections of gene expression data from forebrain interneurons onto each dataset's first tPCs. Samples correspond to cells; colours indicate cell types. Variance explained by tPC1&2: 23.3% (mouse), 22.7% (human), 13.7% (turtle), and 12.9% (zebra finch). (b) Schematic: principal angles measure dissimilarity between subspaces spanned by two sets of tPCs (see Methods). Larger angles indicate larger differences. (c) Principal angles between human and mouse subspaces are smaller than between mouse and zebra finch or turtle subspaces. Chance level estimated by sampling random, normalized vectors. (d) Schematic: Variance explained in the mouse data as a measure of tPC similarity. A tPC's length is proportional to the variance it explains. (e) Variance of mouse data explained by tPCs of different datasets, normalized to the variance explained by mouse tPC1. The human, zebra finch, and turtle tPC1 explain 15.7%, 4.5%, and 1.2% of the variance explained by mouse tPC1. A random direction (dashed line) explains 0.3%. (f) Schematic: Predicting mouse state modulation from human tPC1. The colour gradient symbolizes the state modulation of mouse cells. (g) State modulation of mouse interneurons can be predicted from the interneuron's projection onto human tPC1 but not onto turtle or zebra finch tPC1.  $R^2$ : cross-validated fraction of variance explained,  $r$ : Pearson correlation. (h) Subsampling procedure to control for the relative abundance of interneuron subclasses across datasets. Colours code for cell types (see (a)). (i,j) Matching the relative abundance does not increase the similarity of datasets as measured using principal angles. Numbers indicate order or PCs. Data from refs. [6] (mouse), [15] (human), [18] (turtle), [19] (zebra finch).

117 species differences by comparing three mouse datasets (Fig. 3a): the in situ data from VISp layers (L) 1-3 [9], the  
118 plate-based (SMART-seq2) data from VISp L1-6 [6], and the droplet-based (10X) data from multiple cortical  
119 and hippocampal areas (Ctx & Hpc, [29])

120 Visually, the projections onto the first tPCs were similar (Fig. 3b), with interneurons clustering by develop-



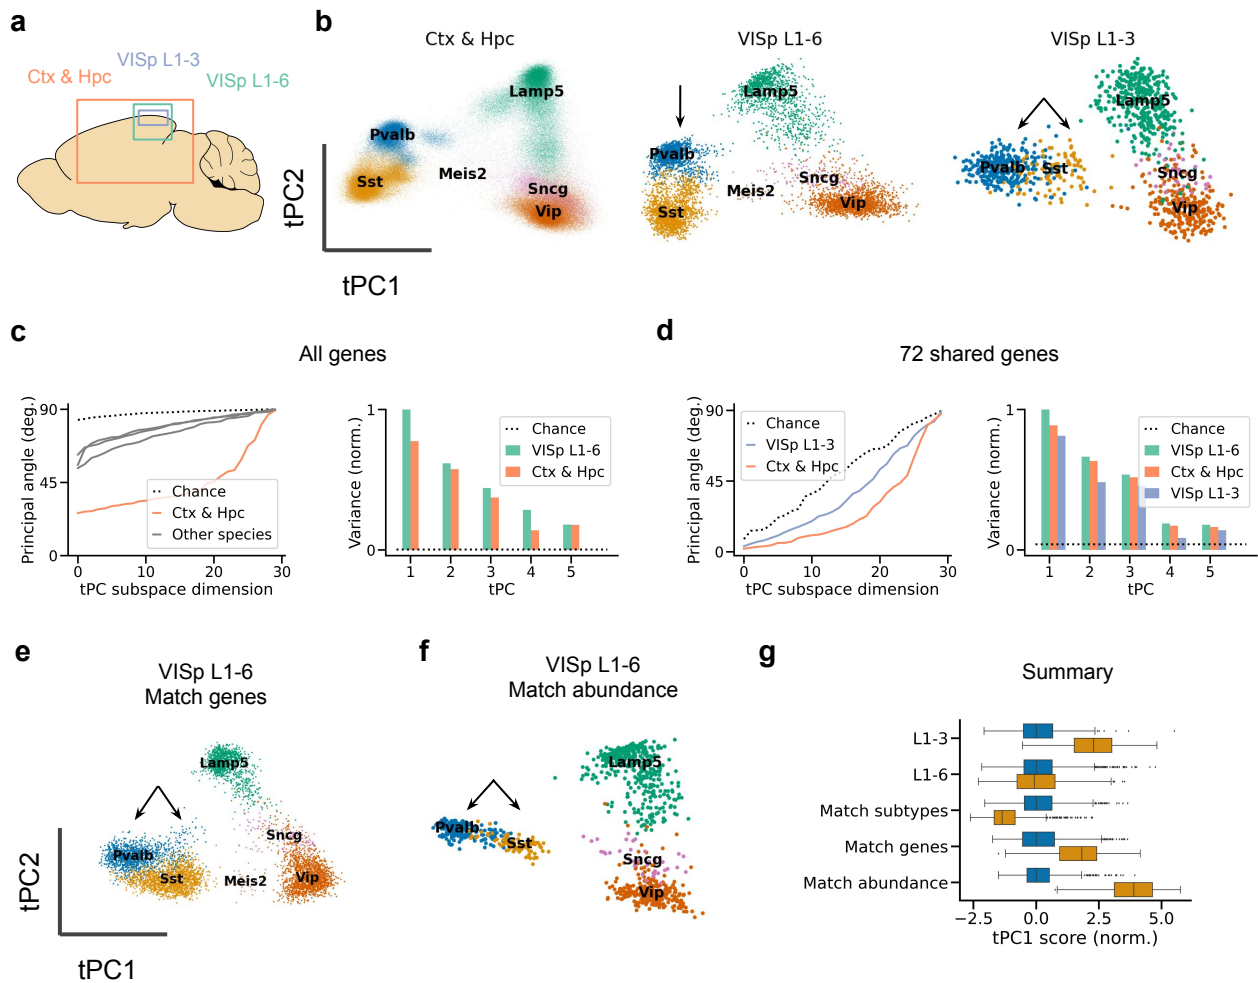

**Figure 3: Similar transcriptomic PCs across mouse data sets.** (a) Schematic of brain areas sequenced for different mouse datasets. Ctx: cortex, Hpc: hippocampal formation, VISp: primary visual cortex. The datasets were also collected using different technologies (Table 1). (b) Similar tPC1&2 across mouse datasets; tPCs1&2 jointly explain 18.0%, 23.8%, and 29.8% of variance, from left to right. Arrows indicate a qualitative difference: the relative position of Pvalb and Sst cells along tPC1. (c) Quantitative comparison with VISp L1-6 dataset based on 2000 highly variable genes; tPC1 of the Ctx & Hc dataset explains 77.5% of the variance explained by tPC1 of VISp L1-6. Grey lines: cross-species angles, taken from Fig. 2c. (d) As (c), but based on the 72 genes shared by the three datasets. In this reduced space, tPC1 of the Ctx & Hc and VISp L1-3 explains 88.7% and 81.3%, respectively, of the variance explained by VISp L1-6. (e) Relatively small change in Pvalb and Sst position after matching gene sets between L1-6 and L1-3 data. (f) Larger differences due to relative cell type abundance. (g) Distribution of tPC1 projection of Pvalb (blue) and Sst (orange) cells for the L1-3 data and different versions of the L1-6 data. Match subtypes: select only the Sst subtypes present in the L1-3 dataset. Match genes: select only the genes present in the L1-3 dataset. Match abundance: subsample such that Sst cells comprise only 8% of the samples, as in the L1-3 data. Projections were normalized such that the mean and variance of the respective Pvalb population were zero and one, respectively. Expression data from refs. [29] (Ctx & Hpc), [6] (VISp L1-6), and [9] (VISp L1-3).

121 mental area, as before. But subtle differences were also visible. For example, the L1-3 dataset lacked a Meis2  
 122 population present in both L1-6 datasets (Fig. S8; [6, 29]). The tPC1 score of Sst cells also varied between  
 123 datasets. In the L1-3 data, Sst cells occupied an intermediate position on tPC1 (and tPC2) compared to Pvalb  
 124 cells, consistent with their weaker state modulation (Fig. S1b). In contrast, Sst and Pvalb cells occupied similar  
 125 positions in the other datasets.

126 The three datasets were also quantitatively similar. Principal angles between different mouse datasets were  
 127 substantially smaller than angles between species (Fig. 3c). To compare the larger mouse datasets with the  
 128 smaller dataset of Bugeon et al. [9], we performed the same analyses after selecting the 72 genes shared by all  
 129 datasets. This revealed the Ctx & Hpc data to be more similar to the VISp L1-6 data than the VISp L1-3 data  
 130 (Fig. 3d), consistent with the varying relative positions of the cell types in the space of the first two PCs.

131 Several factors could explain the different positions of Pvalb and Sst cells along tPC1 and tPC2 (arrows

132 in Fig. 3b). We first tested if the difference was due to layer-specific subtypes known to be transcriptomically  
133 identifiable (see, e.g., [6, 42]). However, selecting L1-3 subtypes from the L1-6 data followed by PCA only moved  
134 the Sst cells further along tPC1 (Fig. 3g, "match subtypes"). We next tested for the influence of gene set by  
135 performing PCA on the L1-6 data after selecting 72 genes describing the L1-3 dataset. This only modestly in-  
136 creased the similarity to the in situ data (Fig. 3e), reflecting the careful selection of the gene panel [43]. Finally,  
137 we reasoned that the intermediate position of Sst cells in the L1-3 data could be due to their relative sparsity  
138 (8% in the L1-3 data vs 28% in the L1-6 data). After all, a given pattern of covariability explains less variance  
139 when present in a smaller number of samples. Indeed, sampling the same number of cells from the entire Sst  
140 population moved the Sst population to an intermediate tPC1 position (Fig. 3f). Therefore, the intermediate  
141 position of Sst cells in the L1-3 dataset might be due to their relative sparsity.

142  
143 In summary, mouse datasets are highly similar to cross-species datasets despite differences in brain area [6]  
144 and sequencing technology [44]. Two human datasets [14, 15] showed equally high levels of similarity (Fig. S9).  
145 Between-species differences, therefore, likely reflect biologically meaningful signals rather than technical arte-  
146 facts.

## 147 Evolution of cholinergic receptor expression

148 So far, we have shown that interspecies expression differences are reflected in the first principal components.  
149 This rules out a conserved tPC1 that predicts state modulation—at least across evolutionarily distant species.  
150 However, it does not rule out that the species-specific tPCs predict state modulation. Unfortunately, this cannot  
151 be tested directly due to the lack of data on state modulation for the other species. As a proxy, we, therefore,  
152 analyzed the expression of cholinergic receptors that are known to contribute to the correlation between tPC1  
153 and state modulation in mice (Fig. 4a, [9]).

154 According to our analysis (see Methods), five cholinergic receptors can predict state modulation of upper-  
155 layer subtypes in held-out data in mice (Fig. S10). These receptors also ranked among the top genes in their  
156 correlation with state modulation (Fig. 4b). The predictive nicotinic receptors (Chrna3,4,5) showed a rough  
157 gradient along tPC1 (see, Fig. 4c). The only predictive inhibitory receptor (Chrm4), on the other hand, was  
158 expressed by Pvalb neurons (Figs. 4d), consistent with their negative state modulation (Fig. S1b).

159 Do the same receptors mediate state modulation in other species? If yes, one would expect differential  
160 expression across cell types, with a similar pattern as in mice. However, several receptors that predict state  
161 modulation in mice show qualitatively different patterns of expression in the other species (Fig. 4e,f,g). For  
162 example, Chrna4 and Chrna5 show much weaker expression in the human data than in mice (Fig. 4e). Chrm4  
163 is overexpressed in the turtle data relative to the other species (Fig. 4f).

164 The general trend is that the predictive receptors are under-expressed in the other datasets. A possible  
165 explanation is a regression to the mean: predictive receptors are, by necessity, expressed in mice. But the relative  
166 expression in other datasets could also be due to technical reasons such as a lower sequencing depth (Table 1).  
167 Indeed, the typical mouse cell contained several orders of magnitude more RNA counts than the typical human  
168 cell (Fig. 4h). We controlled for this confound by downsampling the mouse data to the sequencing depths of  
169 the other datasets (Methods). To measure variability, we also applied this procedure to two datasets from the  
170 same species, which revealed typical log2-fold expression differences between -2 and 2 (Fig. S11)—downsampling  
171 retained larger differences between species that are qualitatively consistent with the analysis of the full datasets.  
172 In the human data, Chrm4, and to a lesser extent Chrna3 & 4, were still underexpressed after downsampling  
173 (Fig. 4i). Chrm3 and Chrna5 were underexpressed in the turtle data, whereas Chrm4 was overexpressed (Fig. 4j).  
174 In the songbird data, only Chrm4 was overexpressed (Fig. 4k).

175 Thus, several cholinergic receptors that might mediate state modulation in mice show species-specific ex-  
176 pression. This suggests that homologous cell types in different species could show substantial differences in state  
177 modulation.

## 178 Robustness of state modulation to cholinergic receptor expression

179 How do species-specific cholinergic receptor expression patterns influence cortical information flow? Since this  
180 depends not just on the cell type-specific gene expression but also on the interplay of different interneurons,  
181 we investigated this question using a circuit model (Methods). We focused on the most salient differences in  
182 receptor expression between the three species with a cortex (mice, humans, and turtles).

183 The model consists of the three most common interneuron types, Pvalb, Sst, and Vip cells, whose connectivity  
184 patterns have been mapped [45, 46] and are relatively conserved, at least in mice and humans [47]. Additionally,  
185 the computational repertoire of this "canonical circuit" has previously been investigated [48, 49, 50]. To explore  
186 the effect of cholinergic modulation on excitatory activity, we also included a two-compartmental pyramidal  
187 neuron. These two compartments receive different information streams: whereas the soma receives feedforward

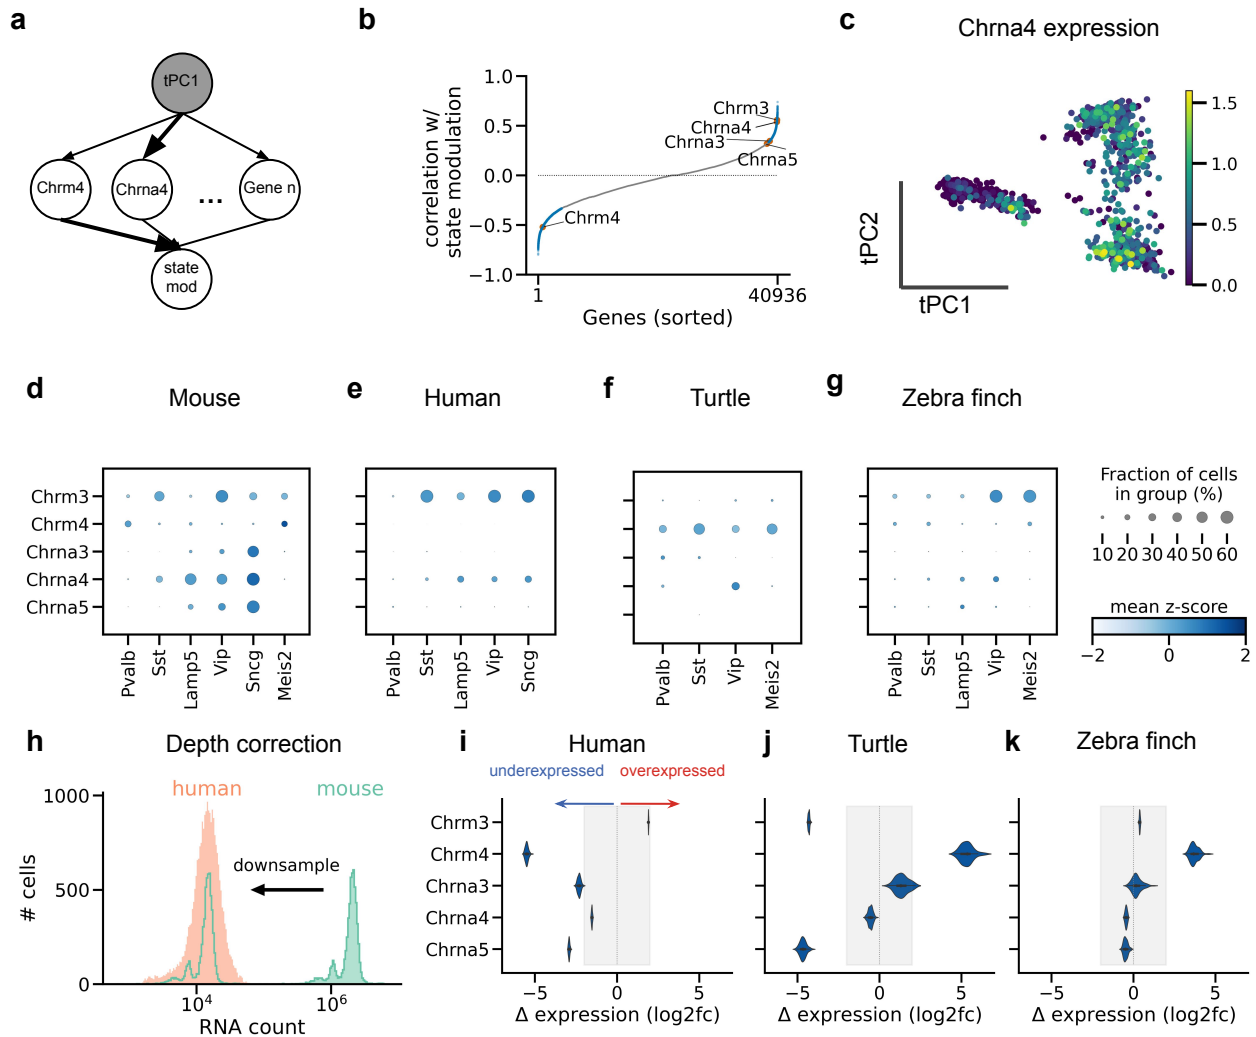

**Figure 4: Evolution of cholinergic receptor expression** (a) Graphical model of the relationship between tPC1, gene expression, and state modulation. The shaded variable tPC1 is not directly observable. Arrows indicate direct dependence relationships; arrow thickness indicates the strength of the relationship. (b) Correlation between gene expression and state modulation in the mouse data. Gene expression and state modulation were not measured in the same cells and were therefore combined at the level of subtypes (Methods). Blue: significant correlation ( $p < 0.05$ ), grey: not significant. Annotated are the cholinergic receptors that predict state modulation (Fig. S10). Chr4 is ranked 327th (top 1.5%) with the strongest negative correlation. Chr3 and Chrna3, 4 & 5 are among the top 1.7%, 2.4%, 7.1%, and 8.1% with the strongest positive correlation. (c) tPC projection of mouse VISp L1-6, coloured by Chrna4 expression (log CP10K). Upper layer Sst types were selected before PCA to retain the cell type arrangement of Bugeon et al. (Fig. 3f) (d-g) Dotplots of cell type-specific cholinergic receptor expression, z-scored across all cells. (h) Schematic of RNA count subsampling to control for differences in sequencing depth. Each RNA count from the deeper dataset was sampled with a probability equal to the relative depth of the deep and the shallower dataset (Methods). (i-k) Log2-fold difference in expression with mouse data after subsampling; negative and positive values indicate under- and overexpression, respectively, compared to mouse data. Each violin plot shows the distribution of 100 subsampled datasets. Differences outside of shaded areas are larger than the typical differences between different datasets of the same species (Fig. S11). Without the subsampling procedure, a comparison of raw RNA counts would suggest that every receptor is overexpressed in the mouse by a factor of 8 or more due to the larger sequencing depth of the mouse data. Expression data from refs. [6] (mouse), [9] (VISp L1-3), and [6] (L1-6).

188 (sensory) input, the pyramidal dendrites receive top-down input [51, 52, 53]. For visualisation purposes, these  
 189 input streams were represented by sinusoids of different frequencies (Fig. 5a).

190 We model cholinergic modulation as an additive input to the interneurons with a strength that is based  
 191 on cell type-specific receptor expression data (Methods, Table 3). Cholinergic modulation inhibits the Pvalb  
 192 population via muscarinic ACh receptors (Chr4) while activating Vip cells and — to a lesser extent — Sst  
 193 cells via nicotinic ACh receptors. The activated Sst cells suppress inputs arriving at the dendrites [54, 55, 56],

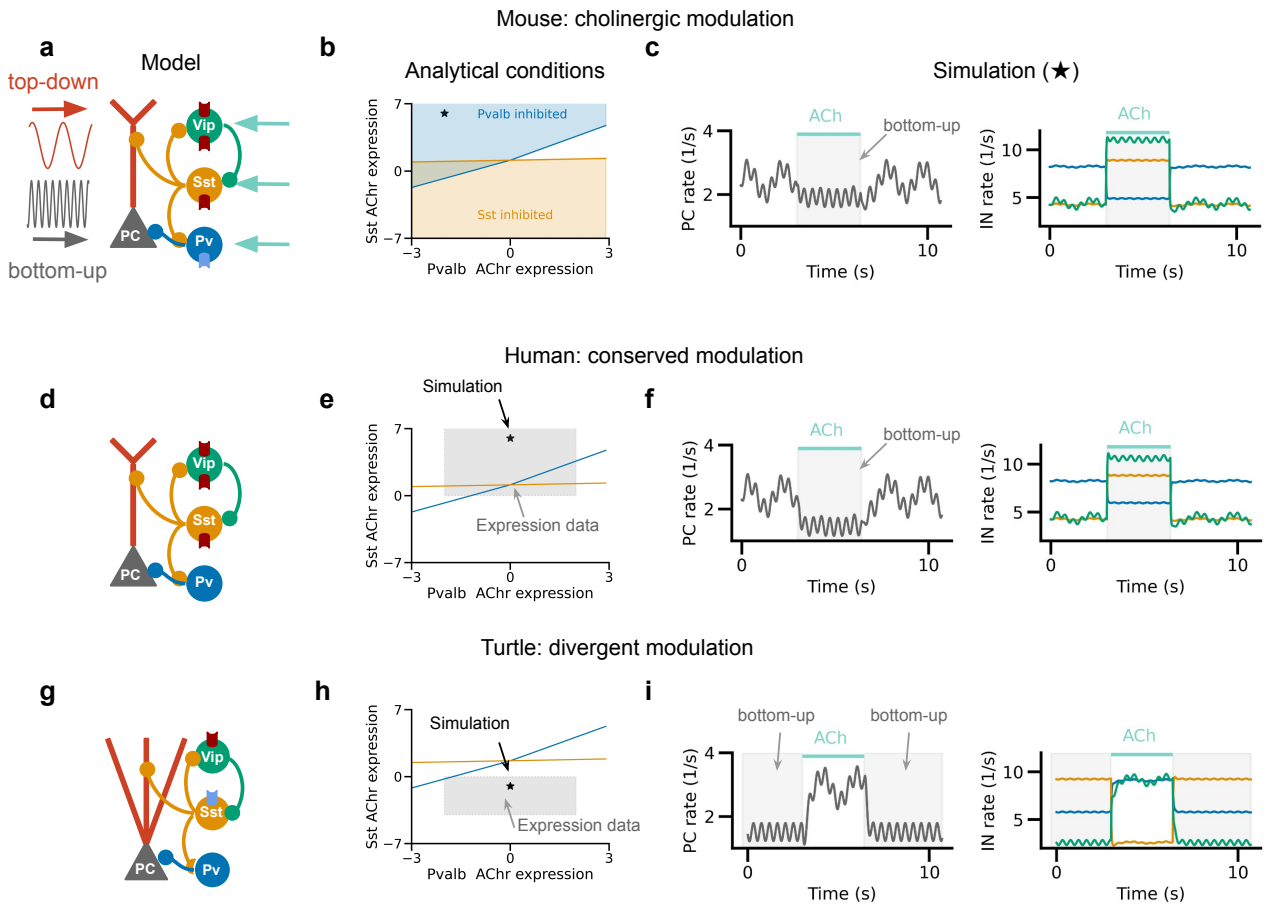

**Figure 5: Circuit model predicts functional consequences of cholinergic receptor expression divergence** (a) Schematic of mouse cortical circuit model. PC: pyramidal cell. Grey and red sinusoids represent inputs to pyramidal soma and dendrites, respectively; teal arrows represent cholinergic modulation of interneurons. Excitatory and inhibitory ACh receptors are shown in red and blue, respectively. (b) Analytical prediction of the Pvalb and Sst ACh receptor expression values for which Pvalb and Sst cells are inhibited by ACh (see Methods). The star indicates parameter settings used for simulation in (c). At baseline, the PC rate reflects both somatic and dendritic inputs. Cholinergic activation inhibits the dendritic contribution by activating Sst cells. (d) Human cortical circuit model, in which Pvalb cells lack inhibitory ACh receptors. (e) As (b), but with the shaded area indicating expression values qualitatively consistent with the human data. Star: parameter settings used for simulation in (f). Cholinergic modulation has a qualitatively similar effect due to the indirect cholinergic inhibition of Pvalb neurons via the Sst neurons. (g) Turtle circuit model with inhibitory ACh receptor expression in Sst cells. (h) As (b), but with the shaded area indicating turtle expression values. Star: parameter settings used for simulation in (i). In contrast to the mammalian circuit models, cholinergic modulation causes a disinhibition of dendritic inputs.

194 and increase the effective cholinergic inhibition of Pvalb cells. By recruiting dendritic inhibition, ACh therefore  
 195 limits the influence of top-down inputs on PC rates ([57, 58]; Fig. 5c) while enhancing the influence of top-down  
 196 inputs [59, 60].

197 How might cholinergic modulation affect interneuron activity and information flow in other species? We  
 198 modelled a human cortical circuit by deleting the inhibitory Chrm4 receptor from the Pvalb population, mim-  
 199 icking the strongest difference with the mouse VISp data (Fig. 5d). Mathematical analyses indicate that Pvalb  
 200 activity is still reduced in the presence of ACh due to inhibition from Sst cells (Fig. 5e,f; see Methods). The  
 201 difference in direct cholinergic inhibition in Pvalb interneurons between humans and mice might therefore have  
 202 a relatively weak functional consequence. This is consistent with experimental data [61] and the variable Chrm4  
 203 expression across mouse datasets (Fig. S11). By contrast, we found a qualitatively different effect after changing  
 204 the ACh receptor densities to mimic the turtle data (Fig. 5g): the over-expression of inhibitory Chrm4 receptors  
 205 by Sst instead of Pvalb cells led to cholinergic disinhibition of dendritic inputs (Fig. 5h,i). This qualitative de-  
 206 viation from the mammalian cortex could affect the state-dependent processing of bottom-up versus top-down  
 207 inputs in reptiles (see Discussion).



208 These findings suggest that the computation performed by the circuit can be very sensitive to certain patterns  
209 of differential expression and robust to others [62, 63].

## 210 Discussion

211 We have shown that the global gene expression patterns of inhibitory interneurons, as assessed by PCA, show  
212 considerable similarity between mice and humans. However, such similarity is not observed between mice and  
213 turtles or songbirds. This suggests that the first transcriptomic PC (tPC1) obtained from the upper layers of the  
214 mouse cortex [9] may serve as an organizing principle for mammalian interneurons but not for reptilian and avian  
215 interneurons. Control analyses indicate that technical factors cannot explain cross-species differences. Instead,  
216 our results suggest that the evolutionary divergence of homologous interneurons is mainly explained by changes  
217 in gene expression rather than changes in the relative abundance of cell types. Alongside the differences in global  
218 expression patterns, we have also observed differences in the expression of cholinergic receptors, suggesting that  
219 interneurons undergo species-specific modulation in their functional states.

### 220 Comparison to prior work

221 The gross transcriptomic differences between species might be surprising given the evolutionary conservation  
222 of interneurons in the forebrain [18, 19, 15, 16] and other areas [20, 17]. However, these works also found  
223 many genes to have species-specific expression, suggesting cell types might be homologous across species but  
224 not preserved in their detailed properties. Moreover, fine interneuron subtypes are not necessarily conserved  
225 across larger evolutionary distances [64].

226 Cholinergic modulation with arousal and other cognitive processes has been reported in many species (see,  
227 e.g., [65, 66, 67, 68, 69, 70]), and might even be mediated by similar midbrain cell types [71]. However,  
228 acetylcholine seems to achieve its conserved effects via species-specific pathways [72]. For example, most human  
229 but not rat PV neurons express the *Chrm1* receptor [73]. Even within a single species, cholinergic projections  
230 and their effects vary across areas [74, 75, 27] and layers [76, 77]. Additionally, serotonergic receptors are  
231 among the most differentially expressed gene sets between humans and mice [14]. Therefore, our differential  
232 receptor expression findings are broadly consistent with earlier work. It should be noted, however, that technical  
233 differences between datasets naturally pose a more serious limitation for comparing the expression of individual  
234 genes than aggregate measures such as PCA. Future work will therefore need to confirm the present results  
235 using, e.g., immunohistochemistry.

### 236 Interpretation of transcriptomic PCs

237 Across all datasets, one feature consistently stands out: the clustering along tPC1&2 by developmental area.  
238 A similar pattern has been previously observed based on nonlinear dimensionality reduction and clustering  
239 methods (see, e.g., [6, 40]). The structuring of top PCs by developmental origin and cell type is expected since  
240 cell types are defined by developmentally-activated transcription factors that coregulate batteries of protein-  
241 coding genes [78, 79]. These low-dimensional patterns of gene expression are naturally picked up by a method  
242 like PCA.

243 A clear difference between the mouse datasets is given by two layer-specific subtypes: the deep-layer *Meis2*  
244 cells [37, 6], and long-range projecting *Sst Chodl* cells [80, 6]. Their intermediate position along tPC1 (Fig. S8)  
245 but distinct connectivity suggests that the correlation of tPC1 with cellular properties [9] might not apply to  
246 these deep layer subtypes. This could be further tested using, for example, Patch-seq experiments [81, 82]. A  
247 caveat is the relative sensitivity of PCA to cell-type proportions: the intermediate tPC1 scores of *Meis2* cells  
248 may be caused by their scarcity in the mouse data.

### 249 Evolution of cholinergic modulation

250 Many genes are at least as predictive of state modulation as cholinergic receptors (Fig. 4b). Some genes  
251 might be causally related to state modulation, but others are merely co-regulated with causal genes (Fig. 4a).  
252 Thus, strong correlations—the very property that allows the reliable identification of transcriptomic PCs—also  
253 preclude the identification of causal genes based on regression analyses. Whether genes predict state modulation  
254 also depends on factors only partially under genetic control, such as synaptic connectivity. For example, our  
255 network simulations show that connectivity patterns influence which cholinergic receptor expression differences  
256 affect state modulation (Fig. 5). Finally, species differences in state modulation may not necessarily imply  
257 differences in function. An interesting example is turtle *Sst* cells' expression of the inhibitory *Chrm4* receptor,  
258 which might lead to cholinergic disinhibition of pyramidal dendrites. Since sensory inputs to turtle cortex arrive  
259 in layer 1 instead of deeper layers [30, 83], we speculate that acetylcholine can thus disinhibit sensory inputs,  
260 as it potentially does in mouse cortex. Alternatively, cholinergic modulation could have qualitatively different



261 effects on the processing of bottom-up versus top-down inputs in turtle compared to mouse cortex. Future  
262 experiments could arbitrate between these alternatives.

## 263 Conclusion

264 The wide availability of transcriptomic data in different species offers new opportunities for comparative anal-  
265 yses. Transcriptomic data can not only predict behavioural features such as state modulation but also the  
266 electrophysiology and morphology of homologous cell types ([84, 7, 85], but see [24]) which are more acces-  
267 sible. It will be exciting to see whether these predictions generalize across species and if they correlate with  
268 high-variance transcriptomic dimensions. More generally, we expect that future cross-species experiments will  
269 complement work in genetically accessible mice to reveal general principles of brain function.

## 270 Acknowledgements

271 We thank Trygve Bakken, Michael Brainard, Stéphane Bugeon, Bradley Colquitt, Kenneth Harris, and Bosiljka  
272 Tasic for their feedback. We are also grateful to Sadra Sadeh for suggesting a modelling approach.

## 273 Methods

274 Code was written in Python and R and combined into a reproducible workflow using Snakemake [86]. The code  
275 will be made available at [https://github.com/JoramKeijser/transcriptomic\\_axes](https://github.com/JoramKeijser/transcriptomic_axes) upon publication.

## 276 Datasets

277 An overview of the analysed datasets is shown in Table 1, Table 2 lists the relative frequency of different cell  
278 types in each dataset.

| Name          | Species                   | Area(s)   | Technology       | Cells   | Genes/cell | Reads       |
|---------------|---------------------------|-----------|------------------|---------|------------|-------------|
| Bugeon [9]    | Mus musculus              | VISp L1-3 | CoppaFish (sc)   | 1,065   | 49         | -           |
| Tasic [6]     | Mus musculus              | VISp      | SS v4 (sc)       | 6,125   | 9,795      | 2,009,806   |
| Yao [29]      | Mus musculus              | Ctx & Hpc | 10x V2 (sc)      | 177,614 | 3,750      | 8,957       |
| Bakken [15]   | Homo sapiens              | M1        | SS v4 & 10X (sn) | 23,992  | 4,719      | 14,337.5    |
| Hodge [14]    | Homo sapiens              | MTG       | SS V4 (sn)       | 4,164   | 8,344.5    | 1,901,796.5 |
| Colquitt [19] | Taeniopygia guttata       | HVC & RA  | 10X v2 (sn)      | 3,786   | 161.5      | 3,150.5     |
| Tosches [18]  | Trachemys scripta elegans | Ctx       | Drop-Seq v3 (sc) | 640     | 2,952      | 6,284       |

**Table 1:** Overview of analysed datasets. Sn: single nucleus, sc: single cell. SS: Smart-Seq. M1: primary motor cortex, VISp: primary visual cortex, HVC: high vocal centre, MTG: middle temporal gyrus, Ctx: cortex, Hpc: hippocampal formation. Genes/cell: median number of genes detected per cell. Reads: median number of reads per cell. For the single nucleus data, reads aligned to exons and introns were used. The data from ref. [9] comprised already normalized counts; the number of reads was therefore unavailable.

|       | Bakken [15] | Bugeon [9] | Colquitt [19] | Hodge [14] | Tasic [6] | Tosches [18] | Yao [29] |
|-------|-------------|------------|---------------|------------|-----------|--------------|----------|
| Pvalb | 32.4        | 27.9       | 31.9          | 17.5       | 21.8      | 13.8         | 17.2     |
| Sst   | 25.0        | 8.5        | 21.0          | 30.6       | 28.4      | 19.5         | 26.7     |
| Lamp5 | 18.6        | 35.8       | 4.7           | 27.8       | 18.3      | 0.0          | 23.7     |
| Vip   | 20.2        | 24.4       | 11.2          | 24.1       | 28.7      | 24.2         | 24.6     |
| Sncg  | 3.7         | 3.5        | 0.0           | 0.0        | 2.0       | 0.0          | 7.8      |
| Meis2 | 0.0         | 0.0        | 31.3          | 0.0        | 0.7       | 42.5         | 0.0      |

**Table 2:** Percentage of cell types for each dataset, rounded to a single decimal place. The mammalian Meis2-positive cells are likely not homologous to the turtle/finch Meis2-positive cells ([19], see text) but are grouped for convenience.

## 279 Replication of Bugeon et al.

280 The starting point of our replication was the in vivo calcium imaging data and in situ transcriptomic data  
281 previously described by Bugeon et al. [9]. We preprocessed and analysed these data following the original paper  
282 unless indicated otherwise. We selected interneurons with a high-confidence assignment to a particular subtype

(posterior probability [43] at least 0.5) that belonged to a subtype with at least 3 cells. We used the previous assignment into 35 upper-layer subtypes and grouped *Serpinf1* cells into the *Vip* class. Consistent with the original publication, this resulted in 1065 cells, hierarchically distributed across 5 subclasses (e.g., *Pvalb*) and 35 subtypes (e.g., *Pvalb-Reln-Itm2a*). The *Npy* gene count of 58 cells was missing (NaN); we assumed these values were missing at random and imputed them with the subtype-specific median value. Zero-imputation gave similar results. We computed each cell’s average activity per behavioural state. Whenever a cell was recorded during multiple sessions, we used the session with the longest period of “stationary synchronised” activity since this was the least frequent state. Since 193 cells were not recorded during the stationary synchronised state, state modulation was computed for the remaining 872 cells. The expression matrix contained continuously valued estimates of gene expression instead of integer counts. We normalized these values to 10,000 “counts” per cell for consistency with the other datasets, although this slightly decreased predictive performance. Finally, we log-transformed the normalized values after adding one pseudo-count,  $\log(1 + x)$ . The log transformation is a widely used preprocessing step in the analysis of count data [87, 88], although other transformations are also possible (see, e.g., [89, 90]). Linear least squares regression was used to predict state modulation from individual PCs or cholinergic receptors; cross-validated ridge regression was used to predict state modulation from multiple PCs, to mitigate overfitting.

## Other datasets

The transcriptomic datasets each consisted of raw count matrices and metadata that included cell class and subtype/cluster. For the Tasic dataset, we only considered the *VISp* (not the *ALM*) cells to allow for a direct comparison with Bugeon et al. In the mouse datasets, we merged the small number of *Serpinf1* cells into the *Vip* cluster for consistency with the analyses from ref. [9]. From the Colquitt and Tosches datasets, we only used the zebra finch and turtle cells, respectively, since the data from other species (Bengalese finch and lizard) contained only a small number of interneurons. For both datasets, we assigned cells to putative mammalian homologues according to the correlation-based matching in the original publications [18, 19]. For the Hodge dataset, we assigned each cell a cell type based on the original publication [14]. Genes were named according to the mouse convention (e.g., “*Npy*” instead of the human “*NPY*”). We selected the 11968 shared genes by intersecting the gene lists from all datasets (except the Bugeon data, which has 72 genes) to put the datasets in a shared space.

## Principal component analysis (PCA)

We scaled gene expression values to 10,000 counts per cell (CP10K) to account for differences in sequencing depth across cells, and log-transformed the normalized data. We then identified the top 2000 highly variable genes based on their dispersion across cells (Scanpy’s `highly_variable_genes`; using 3000 genes gave similar results). We computed the top 30 PCs based on these highly variable genes. For visual comparison, we made an arbitrary but consistent choice for the signs of *tPC1* and *tPC2*.

We quantified the similarity of PCs from different datasets using principal angles ([91]; Scipy’s `subspace_angles`). More precisely, let  $W_X$  be the gene-by-PC matrix whose columns are the PCs of dataset  $A$ . The principal angles between the PC subspaces of datasets  $A$  and  $B$  are computed from the singular value decomposition (SVD) of the PC-by-PC matrix  $W_A^T W_B$ , i.e.

$$W_A^T W_B = U \Sigma V^T.$$

The columns of  $U$  and  $V$  contain paired linear combinations of PCs from datasets  $A$  and  $B$ , respectively, ordered by principal angles. The diagonal matrix  $\Sigma$  contains the singular values  $\sigma_i$ . The  $i$ th principal angle from the corresponding singular value  $\sigma_i$  is computed as

$$\vartheta_i = \arccos(\sigma_i).$$

As a complementary measure of PC subspace similarity, we computed the variance explained in one dataset by the top PCs of another dataset. Let  $\mathbf{w}_{A,i}$  be the  $i$ th PC of dataset  $A$ , and let  $C^B$  be the covariance matrix of dataset  $B$ . The  $i$ th PC of dataset  $A$  explains an amount of variance in dataset  $B$  equal to

$$\mathbf{w}_{A,i}^T C^B \mathbf{w}_{A,i}.$$

For each pairwise comparison, we computed the covariance and PCs only from genes that were highly variable in both datasets. This was done to avoid the computation of large covariance matrices. For comparison, the variance of each PC was normalized by the variance explained by the first PC of the original dataset:

$$\text{normalized variance} = \frac{\mathbf{w}_{B,i}^T C^A \mathbf{w}_{B,i}}{\mathbf{w}_{A,1}^T C^A \mathbf{w}_{A,1}}.$$

317 Chance level was estimated by computing the variance explained by a random, normalized vector. To predict  
318 state modulation from the tPCs of other species, we first intersected their gene sets with the 72 genes from  
319 Bugeon et al. [9] We then separately preprocessed both datasets. Finally, we projected the Bugeon data onto  
320 tPC1 from the secondary dataset and used this to predict state modulation. Performance was quantified using  
321 leave-one-out  $R^2$  and the Pearson correlation coefficient.

## 322 Subsampling gene counts

The datasets vary in their sequencing depth (the number of RNA counts per cell, see Table 1), presumably due to a combination of technical and biological differences. We aimed to control for these differences by downsampling counts to the depth of the shallower dataset, as follows. Let  $X_{cg}^d$  be the number of counts from gene  $g$  in cell  $c$  of dataset  $d$ . We defined the count depth of a dataset as the average counts per cell:

$$\text{depth}(d) = \frac{1}{C \cdot G} \sum_{c,g} X_{c,g}^d.$$

Here  $C$  is the number of cells, and  $G$  is the number of genes. If  $d_1$  is the shallowest dataset, and  $d_2$  is a deeper-sequenced dataset, we define their relative sequencing depth as

$$p = \frac{\text{depth}(d_1)}{\text{depth}(d_2)} \in (0, 1).$$

To match the sequencing depth of the shallower dataset, we keep each gene count with a probability  $p$ :

$$\hat{X}_{c,g}^{d_2} \sim \text{Binomial}(X_{c,g}^{d_2}, p).$$

323 This subsampling procedure equalizes the sequencing depth of the down-sampled dataset to that of the shallower  
324 dataset. The Tasic and Hodge data served as the reference datasets for comparison with the mouse and human  
325 expression values, respectively, since these were the deepest datasets.

## 326 Dataset integration

327 We used Seurat’s anchor-based integration [38] to map datasets onto the Tasic data (Fig. S5). To this end,  
328 we converted the AnnData objects to Seurat objects. Next, we separately log normalized each dataset as  
329 described above (this time using the equivalent Seurat function `NormalizeData`), and found genes that were  
330 highly variable across datasets (`FindVariableFeatures`, followed by `SelectIntegrationFeatures`, with 2000  
331 features). Next, we found mutual nearest neighbours across datasets (“anchors”) after projecting each dataset  
332 onto the other’s PCA space (reciprocal PCA). A more flexible reduction method (canonical correlation analysis)  
333 gave similar results. We then used the anchors to identify and project out dataset-specific differences. After  
334 integration, PCA was performed separately on each transformed dataset.

## 335 Network simulations

We simulated a rate-based network of Pvalb, Sst, and Vip interneurons and excitatory pyramidal neurons. A single equation represented each cell type except for the pyramidal neurons, represented by two equations, modelling the somatic and dendritic compartments. The network state was defined by the rate vector  $\mathbf{r} = (r_e, r_d, r_p, r_s, r_v)$ , of somatic, dendritic, Pvalb, Sst, and Vip activity. The rate of cell type/compartments  $x$  evolved according to

$$\tau_x \dot{u}_x = -u_x + \sum_{y \neq x} w_{x,y} r_y + I_{x,0} + I_x + m_x, \quad x \in \{e, d, p, s, v\}, \quad (1)$$

$$r_x = f(u_x). \quad (2)$$

Here  $\tau_x$  is the membrane time constant (2 ms for excitatory cells, 10 ms for inhibitory cells),  $f(u) = \max(u, 0)$  is the rectified linear activation function, and the  $w_{xy}$  are recurrent weights.  $I_{x,0}$  is a constant background input that sets the baseline rate,  $I_x$  is a time-varying external input, and  $m_x$  is an additive cholinergic modulation. We will refer to  $m_x$  as a cell’s cholinergic receptor density to distinguish it from the “effective” cholinergic modulation, which also depends on the network dynamics (see Network analysis).

The recurrent connections were chosen based on experimental [45, 47] and theoretical work [50]. The only difference is relatively weak mutual inhibition between Sst and Vip neurons; strong inhibition could prevent the

simultaneous activation of these cell types observed in the data [9].

$$W = \begin{pmatrix} w_{ee} & w_{ed} & w_{ep} & w_{es} & w_{ev} \\ w_{de} & w_{dd} & w_{dp} & w_{ds} & w_{dv} \\ w_{pe} & w_{pd} & w_{pp} & w_{ps} & w_{pv} \\ w_{se} & w_{sd} & w_{sp} & w_{ss} & w_{sv} \\ w_{ve} & w_{vd} & w_{vp} & w_{vs} & w_{vv} \end{pmatrix} = \begin{pmatrix} 0.42 & 1 & -0.42 & 0 & 0 \\ 0.042 & 0 & 0 & -0.49 & 0 \\ 0.45 & 0 & -0.75 & -0.78 & 0 \\ 0.35 & 0 & 0 & 0 & -0.175 \\ 1 & 0 & 0 & -0.175 & 0 \end{pmatrix} \quad (3)$$

The background inputs  $I_{x,0}$  were set to achieve the following baseline rates:

$$(r_e, r_d, r_p, r_s, r_v) = (1, 1, 8, 4, 3) \quad (1/s).$$

The external inputs to pyramidal soma and dendrites were defined as:

$$I_x(t) = 1 + .5 \sin(\varphi_x t), \quad x \in \{e, d\}.$$

336 with  $\varphi_e = 1/300$  ms (soma) or  $\varphi_d = 1/70$  ms (dendrite).

337 The interneurons received cholinergic modulation instead of external inputs, and their amplitudes were  
 338 varied based on qualitative differences in cholinergic receptor expression (Table 3). These amplitudes were  
 339 the only differences between species-specific networks. In the mouse network, Pvalb neurons were negatively  
 340 modulated; Vip and — to a lesser extent — Sst neurons were positively modulated. This is consistent with both  
 341 the activity and expression data from the mouse. For the other species, we only have expression data. In the  
 342 human and turtle network, Pvalb neurons were not modulated consistent with their weak or absent expression  
 343 of, e.g., Chrm4. In the turtle network, Sst neurons were negatively modulated; Vip neurons were positively  
 344 modulated, but to a smaller extent, given the under-expression of Chrm3 and Chrna5 in the turtle data. For  
 345 the turtle network, we added a positive external input (amplitude 5) to the Sst equation in the absence of  
 346 cholinergic modulation. A similar result could be obtained by decreasing the dendritic drive during baseline.

| species \ cell type | Pvalb | Sst | Vip |
|---------------------|-------|-----|-----|
| Mouse               | -2    | 6   | 8   |
| Human               | 0     | 6   | 8   |
| Turtle              | 0     | -1  | 4   |

**Table 3:** Network parameters: species and cell type-specific additive cholinergic modulation

347 The network dynamics were numerically integrated using a forward Euler scheme with a time step of 0.1  
 348 milliseconds. Each simulation consisted of 11000 time steps divided into a baseline period of 3300 steps, a  
 349 cholinergic modulation time of 3400 steps, and another baseline period of 4300 steps. Not shown in Fig. 5 is an  
 350 initial settling time of 300 timesteps. These values were chosen to let the figure highlight the effect of turning  
 351 the modulation on and off.

## 352 References

- 353 [1] Henry Markram, Maria Toledo-Rodriguez, Yun Wang, Anirudh Gupta, Gilad Silberberg, and Caizhi Wu.  
 354 Interneurons of the neocortical inhibitory system. *Nature reviews neuroscience*, 5(10):793–807, 2004.
- 355 [2] Robin Tremblay, Soohyun Lee, and Bernardo Rudy. Gabaergic interneurons in the neocortex: from cellular  
 356 properties to circuits. *Neuron*, 91(2):260–292, 2016.
- 357 [3] Fuchou Tang, Catalin Barbacioru, Yangzhou Wang, Ellen Nordman, Clarence Lee, Nanlan Xu, Xiaohui  
 358 Wang, John Bodeau, Brian B Tuch, Asim Siddiqui, et al. mrna-seq whole-transcriptome analysis of a  
 359 single cell. *Nature methods*, 6(5):377–382, 2009.
- 360 [4] Amit Zeisel, Ana B Muñoz-Manchado, Simone Codeluppi, Peter Lönnerberg, Gioele La Manno, Anna  
 361 Juréus, Sueli Marques, Hermany Munguba, Liqun He, Christer Betsholtz, et al. Cell types in the mouse  
 362 cortex and hippocampus revealed by single-cell rna-seq. *Science*, 347(6226):1138–1142, 2015.
- 363 [5] Anirban Paul, Megan Crow, Ricardo Raudales, Miao He, Jesse Gillis, and Z Josh Huang. Transcriptional  
 364 architecture of synaptic communication delineates gabaergic neuron identity. *Cell*, 171(3):522–539, 2017.
- 365 [6] Bosiljka Tasic, Zizhen Yao, Lucas T Graybiuck, Kimberly A Smith, Thuc Nghi Nguyen, Darren Bertag-  
 366 nolli, Jeff Goldy, Emma Garren, Michael N Economo, Sarada Viswanathan, et al. Shared and distinct  
 367 transcriptomic cell types across neocortical areas. *Nature*, 563(7729):72–78, 2018.

- 368 [7] Nathan W Gouwens, Staci A Sorensen, Fahimeh Baftizadeh, Agata Budzillo, Brian R Lee, Tim Jarsky,  
369 Lauren Alfiler, Katherine Baker, Eliza Barkan, Kyla Berry, et al. Integrated morphoelectric and tran-  
370 scriptomic classification of cortical gabaergic cells. *Cell*, 183(4):935–953, 2020.
- 371 [8] Federico Scala, Dmitry Kobak, Matteo Bernabucci, Yves Bernaerts, Cathryn René Cadwell, Jesus Ra-  
372 mon Castro, Leonard Hartmanis, Xiaolong Jiang, Sophie Laturmus, Elanine Miranda, et al. Phenotypic  
373 variation of transcriptomic cell types in mouse motor cortex. *Nature*, 598(7879):144–150, 2021.
- 374 [9] Stephane Bugeon, Joshua Duffield, Mario Dipoppa, Anne Ritoux, Isabelle Prankerd, Dimitris Nicolout-  
375 sopoulos, David Orme, Maxwell Shinn, Han Peng, Hamish Forrest, et al. A transcriptomic axis predicts  
376 state modulation of cortical interneurons. *Nature*, 607(7918):330–338, 2022.
- 377 [10] Michael M Yartsev. The emperor’s new wardrobe: rebalancing diversity of animal models in neuroscience  
378 research. *Science*, 358(6362):466–469, 2017.
- 379 [11] Gilles Laurent. On the value of model diversity in neuroscience. *Nature Reviews Neuroscience*, 21(8):395–  
380 396, 2020.
- 381 [12] Nicholas Jourjine and Hopi E Hoekstra. Expanding evolutionary neuroscience: insights from comparing  
382 variation in behavior. *Neuron*, 109(7):1084–1099, 2021.
- 383 [13] Kenneth D Harris, Hannah Hochgerner, Nathan G Skene, Lorenza Magno, Linda Katona, Carolina Bengts-  
384 son Gonzales, Peter Somogyi, Nicoletta Kessaris, Sten Linnarsson, and Jens Hjerling-Leffler. Classes and  
385 continua of hippocampal cal inhibitory neurons revealed by single-cell transcriptomics. *PLoS biology*,  
386 16(6):e2006387, 2018.
- 387 [14] Rebecca D Hodge, Trygve E Bakken, Jeremy A Miller, Kimberly A Smith, Eliza R Barkan, Lucas T  
388 Graybuck, Jennie L Close, Brian Long, Nelson Johansen, Osnat Penn, et al. Conserved cell types with  
389 divergent features in human versus mouse cortex. *Nature*, 573(7772):61–68, 2019.
- 390 [15] Trygve E Bakken, Nikolas L Jorstad, Qiwen Hu, Blue B Lake, Wei Tian, Brian E Kalmbach, Megan Crow,  
391 Rebecca D Hodge, Fenna M Krienen, Staci A Sorensen, et al. Comparative cellular analysis of motor  
392 cortex in human, marmoset and mouse. *Nature*, 598(7879):111–119, 2021.
- 393 [16] Jia-Ru Wei, Zhao-Zhe Hao, Chuan Xu, Mengyao Huang, Lei Tang, Nana Xu, Ruifeng Liu, Yuhui Shen,  
394 Sarah A Teichmann, Zhichao Miao, et al. Identification of visual cortex cell types and species differences  
395 using single-cell rna sequencing. *Nature Communications*, 13(1):6902, 2022.
- 396 [17] Bin Yu, Qianqian Zhang, Lin Lin, Xin Zhou, Wenji Ma, Shaonan Wen, Chunyue Li, Wei Wang, Qian  
397 Wu, Xiaoqun Wang, et al. Molecular and cellular evolution of the amygdala across species analyzed by  
398 single-nucleus transcriptome profiling. *Cell Discovery*, 9(1):19, 2023.
- 399 [18] Maria Antonietta Tosches, Tracy M Yamawaki, Robert K Naumann, Ariel A Jacobi, Georgi Tushev,  
400 and Gilles Laurent. Evolution of pallium, hippocampus, and cortical cell types revealed by single-cell  
401 transcriptomics in reptiles. *Science*, 360(6391):881–888, 2018.
- 402 [19] Bradley M Colquitt, Devin P Merullo, Genevieve Konopka, Todd F Roberts, and Michael S  
403 Brainard. Cellular transcriptomics reveals evolutionary identities of songbird vocal circuits. *Science*,  
404 371(6530):eabd9704, 2021.
- 405 [20] Justus M Kobschull, Ethan B Richman, Noam Ringach, Drew Friedmann, Eddy Albarran, Sai Saroja  
406 Kolluru, Robert C Jones, William E Allen, Ying Wang, Seung Woo Cho, et al. Cerebellar nuclei evolved  
407 by repeatedly duplicating a conserved cell-type set. *Science*, 370(6523):eabd5059, 2020.
- 408 [21] Eszter Boldog, Trygve E Bakken, Rebecca D Hodge, Mark Novotny, Brian D Aeversmann, Judith Baka,  
409 Sándor Bordé, Jennie L Close, Francisco Diez-Fuertes, Song-Lin Ding, et al. Transcriptomic and mor-  
410 phophysiological evidence for a specialized human cortical gabaergic cell type. *Nature neuroscience*,  
411 21(9):1185–1195, 2018.
- 412 [22] Fenna M Krienen, Melissa Goldman, Qiangge Zhang, Ricardo CH del Rosario, Marta Florio, Robert Ma-  
413 chold, Arpiar Saunders, Kirsten Levandowski, Heather Zaniewski, Benjamin Schuman, et al. Innovations  
414 present in the primate interneuron repertoire. *Nature*, 586(7828):262–269, 2020.
- 415 [23] Yongsoo Kim, Guangyu Robert Yang, Kith Pradhan, Kannan Umadevi Venkataraju, Mihail Bota, Luis  
416 Carlos García Del Molino, Greg Fitzgerald, Keerthi Ram, Miao He, Jesse Maurica Levine, et al. Brain-  
417 wide maps reveal stereotyped cell-type-based cortical architecture and subcortical sexual dimorphism.  
418 *Cell*, 171(2):456–469, 2017.



- 419 [24] Federico Scala, Dmitry Kobak, Shen Shan, Yves Bernaerts, Sophie Laturus, Cathryn Rene Cadwell,  
420 Leonard Hartmanis, Emmanouil Froudarakis, Jesus Ramon Castro, Zheng Huan Tan, et al. Layer 4 of  
421 mouse neocortex differs in cell types and circuit organization between sensory areas. *Nature communica-*  
422 *tions*, 10(1):4174, 2019.
- 423 [25] Allan T Gullidge, Susanna B Park, Yasuo Kawaguchi, and Greg J Stuart. Heterogeneity of phasic  
424 cholinergic signaling in neocortical neurons. *Journal of neurophysiology*, 97(3):2215–2229, 2007.
- 425 [26] Veronica C Galvin, Amy FT Arnsten, and Min Wang. Evolution in neuromodulation—the differential  
426 roles of acetylcholine in higher order association vs. primary visual cortices. *Frontiers in neural circuits*,  
427 12:67, 2018.
- 428 [27] Christine F Khoury, Noelle G Fala, and Caroline A Runyan. Region-specific modulation of somatostatin  
429 activity during arousal. *bioRxiv*, pages 2022–01, 2022.
- 430 [28] Joshua X Bratsch-Prince, James W Warren III, Grace C Jones, Alexander J McDonald, and David D  
431 Mott. Acetylcholine engages distinct amygdala microcircuits to gate internal theta rhythm. *bioRxiv*, pages  
432 2023–02, 2023.
- 433 [29] Zizhen Yao, Cindy TJ van Velthoven, Thuc Nghi Nguyen, Jeff Goldy, Adriana E Sedeno-Cortes, Fahimeh  
434 Baftizadeh, Darren Bertagnolli, Tamara Casper, Megan Chiang, Kirsten Crichton, et al. A taxonomy of  
435 transcriptomic cell types across the isocortex and hippocampal formation. *Cell*, 184(12):3222–3241, 2021.
- 436 [30] Anton Reiner. Neurotransmitter organization and connections of turtle cortex: implications for the evolu-  
437 tion of mammalian isocortex. *Comparative Biochemistry and Physiology Part A: Physiology*, 104(4):735–  
438 748, 1993.
- 439 [31] Robert K Naumann, Janie M Ondracek, Samuel Reiter, Mark Shein-Idelson, Maria Antonietta Tosches,  
440 Tracy M Yamawaki, and Gilles Laurent. The reptilian brain. *Current Biology*, 25(8):R317–R321, 2015.
- 441 [32] Anton Reiner, David J Perkel, Laura L Bruce, Ann B Butler, András Csillag, Wayne Kuenzel, Loreta Med-  
442 ina, George Paxinos, Toru Shimizu, Georg Striedter, et al. Revised nomenclature for avian telencephalon  
443 and some related brainstem nuclei. *Journal of Comparative Neurology*, 473(3):377–414, 2004.
- 444 [33] Erich D Jarvis, Onur Güntürkün, Laura Bruce, András Csillag, Harvey Karten, Wayne Kuenzel, Loreta  
445 Medina, George Paxinos, David J Perkel, Toru Shimizu, et al. Avian brains and a new understanding of  
446 vertebrate brain evolution. *Nature Reviews Neuroscience*, 6(2):151–159, 2005.
- 447 [34] Onur Güntürkün and Thomas Bugnyar. Cognition without cortex. *Trends in cognitive sciences*, 20(4):291–  
448 303, 2016.
- 449 [35] Claire Bomkamp, Shreejoy J Tripathy, Carolina Bengtsson Gonzales, Jens Hjerling-Leffler, Ann Marie  
450 Craig, and Paul Pavlidis. Transcriptomic correlates of electrophysiological and morphological diversity  
451 within and across excitatory and inhibitory neuron classes. *PLoS computational biology*, 15(6):e1007113,  
452 2019.
- 453 [36] Lynette Lim, Da Mi, Alfredo Llorca, and Oscar Marín. Development and functional diversification of  
454 cortical interneurons. *Neuron*, 100(2):294–313, 2018.
- 455 [37] Sarah Frazer, Julien Prados, Mathieu Niquille, Christelle Cadilhac, Foivos Markopoulos, Lucia Gomez,  
456 Ugo Tomasello, Ludovic Telley, Anthony Holtmaat, Denis Jabaudon, et al. Transcriptomic and anatomic  
457 parcellation of 5-HT3AR expressing cortical interneuron subtypes revealed by single-cell RNA sequencing.  
458 *Nature communications*, 8(1):14219, 2017.
- 459 [38] Tim Stuart, Andrew Butler, Paul Hoffman, Christoph Hafemeister, Efthymia Papalexi, William M Mauck,  
460 Yuhao Hao, Marlon Stoeckius, Peter Smibert, and Rahul Satija. Comprehensive integration of single-cell  
461 data. *Cell*, 177(7):1888–1902, 2019.
- 462 [39] David Hain, Tatiana Gallego-Flores, Michaela Klinkmann, Angeles Macias, Elena Ciirdaeva, Anja Arends,  
463 Christina Thum, Georgi Tushev, Friedrich Kretschmer, Maria Antonietta Tosches, et al. Molecular diver-  
464 sity and evolution of neuron types in the amniote brain. *Science*, 377(6610):eabp8202, 2022.
- 465 [40] Joram Keijsers and Henning Sprekeler. Cortical interneurons: fit for function and fit to function? evidence  
466 from development and evolution. *Frontiers in Neural Circuits*, 2023.

- 467 [41] Thomas Chartrand, Rachel Dalley, Jennie Close, Natalia A Goriounova, Brian R Lee, Rusty Mann,  
468 Jeremy A Miller, Gabor Molnar, Alice Mukora, Lauren Alfiler, et al. Morphoelectric and transcrip-  
469 tomic divergence of the layer 1 interneuron repertoire in human versus mouse neocortex. *Science*,  
470 382(6667):eadf0805, 2023.
- 471 [42] Sherry Jingjing Wu, Elaine Sevier, Deepanjali Dwivedi, Giuseppe-Antonio Saldi, Ariel Hairston, Sabrina  
472 Yu, Lydia Abbott, Da Hae Choi, Mia Sherer, Yanjie Qiu, et al. Cortical somatostatin interneuron subtypes  
473 form cell-type-specific circuits. *Neuron*, 111(17):2675–2692, 2023.
- 474 [43] Xiaoyan Qian, Kenneth D Harris, Thomas Hauling, Dimitris Nicoloutsopoulos, Ana B Muñoz-Manchado,  
475 Nathan Skene, Jens Hjerling-Leffler, and Mats Nilsson. Probabilistic cell typing enables fine mapping of  
476 closely related cell types in situ. *Nature methods*, 17(1):101–106, 2020.
- 477 [44] Trygve E Bakken, Rebecca D Hodge, Jeremy A Miller, Zizhen Yao, Thuc Nghi Nguyen, Brian Ae-  
478 vermann, Eliza Barkan, Darren Bertagnolli, Tamara Casper, Nick Dee, et al. Single-nucleus and single-cell  
479 transcriptomes compared in matched cortical cell types. *PloS one*, 13(12):e0209648, 2018.
- 480 [45] Carsten K Pfeffer, Mingshan Xue, Miao He, Z Josh Huang, and Massimo Scanziani. Inhibition of inhibition  
481 in visual cortex: the logic of connections between molecularly distinct interneurons. *Nature neuroscience*,  
482 16(8):1068–1076, 2013.
- 483 [46] Xiaolong Jiang, Shan Shen, Cathryn R Cadwell, Philipp Berens, Fabian Sinz, Alexander S Ecker, Saumil  
484 Patel, and Andreas S Tolias. Principles of connectivity among morphologically defined cell types in adult  
485 neocortex. *Science*, 350(6264):aac9462, 2015.
- 486 [47] Luke Campagnola, Stephanie C Seeman, Thomas Chartrand, Lisa Kim, Alex Hoggarth, Clare Gamlin,  
487 Shinya Ito, Jessica Trinh, Pasha Davoudian, Cristina Radaelli, et al. Local connectivity and synaptic  
488 dynamics in mouse and human neocortex. *Science*, 375(6585):eabj5861, 2022.
- 489 [48] Ashok Litwin-Kumar, Robert Rosenbaum, and Brent Doiron. Inhibitory stabilization and visual coding in  
490 cortical circuits with multiple interneuron subtypes. *Journal of neurophysiology*, 115(3):1399–1409, 2016.
- 491 [49] Guangyu Robert Yang, John D Murray, and Xiao-Jing Wang. A dendritic disinhibitory circuit mechanism  
492 for pathway-specific gating. *Nature communications*, 7(1):1–14, 2016.
- 493 [50] Loreen Hertäg and Henning Sprekeler. Amplifying the redistribution of somato-dendritic inhibition by  
494 the interplay of three interneuron types. *PLoS computational biology*, 15(5):e1006999, 2019.
- 495 [51] Matthew Larkum. A cellular mechanism for cortical associations: an organizing principle for the cerebral  
496 cortex. *Trends in neurosciences*, 36(3):141–151, 2013.
- 497 [52] Niansheng Ju, Yang Li, Fang Liu, Hongfei Jiang, Stephen L Macknik, Susana Martinez-Conde, and  
498 Shiming Tang. Spatiotemporal functional organization of excitatory synaptic inputs onto macaque v1  
499 neurons. *Nature communications*, 11(1):697, 2020.
- 500 [53] Anna Schroeder, M Belén Pardi, Joram Keijser, Tamas Dalmay, Ayelén I Groisman, Erin M Schuman,  
501 Henning Sprekeler, and Johannes J Letzkus. Inhibitory top-down projections from zona incerta mediate  
502 neocortical memory. *Neuron*, 2023.
- 503 [54] Masanori Murayama, Enrique Pérez-Garci, Thomas Nevian, Tobias Bock, Walter Senn, and Matthew E  
504 Larkum. Dendritic encoding of sensory stimuli controlled by deep cortical interneurons. *Nature*,  
505 457(7233):1137–1141, 2009.
- 506 [55] Gilad Silberberg and Henry Markram. Disynaptic inhibition between neocortical pyramidal cells mediated  
507 by martinotti cells. *Neuron*, 53(5):735–746, 2007.
- 508 [56] Joram Keijser and Henning Sprekeler. Optimizing interneuron circuits for compartment-specific feedback  
509 inhibition. *PLoS Computational Biology*, 18(4):e1009933, 2022.
- 510 [57] Vinay Parikh, Rouba Kozak, Vicente Martinez, and Martin Sarter. Prefrontal acetylcholine release controls  
511 cue detection on multiple timescales. *Neuron*, 56(1):141–154, 2007.
- 512 [58] Karine Guillem, Bernard Bloem, Rogier B Poorthuis, Maarten Loos, August B Smit, Uwe Maskos, Sabine  
513 Spijker, and Huibert D Mansvelder. Nicotinic acetylcholine receptor  $\beta 2$  subunits in the medial prefrontal  
514 cortex control attention. *Science*, 333(6044):888–891, 2011.
- 515 [59] Michael E Hasselmo. Neuromodulation and cortical function: modeling the physiological basis of behavior.  
516 *Behavioural brain research*, 67(1):1–27, 1995.

- 517 [60] Rosalyn J Moran, Pablo Campo, Mkael Symmonds, Klaas E Stephan, Raymond J Dolan, and Karl J Friston. Free energy, precision and learning: the role of cholinergic neuromodulation. *Journal of Neuroscience*, 33(19):8227–8236, 2013.  
518  
519
- 520 [61] Naiyan Chen, Hiroki Sugihara, and Mriganka Sur. An acetylcholine-activated microcircuit drives temporal  
521 dynamics of cortical activity. *Nature neuroscience*, 18(6):892–902, 2015.
- 522 [62] Astrid A Prinz, Dirk Bucher, and Eve Marder. Similar network activity from disparate circuit parameters.  
523 *Nature neuroscience*, 7(12):1345–1352, 2004.
- 524 [63] Eve Marder, Timothy O’Leary, and Sonal Shruti. Neuromodulation of circuits with variable parameters:  
525 single neurons and small circuits reveal principles of state-dependent and robust neuromodulation. *Annual  
526 review of neuroscience*, 37:329–346, 2014.
- 527 [64] Maria Antonietta Tosches and Gilles Laurent. Evolution of neuronal identity in the cerebral cortex.  
528 *Current opinion in neurobiology*, 56:199–208, 2019.
- 529 [65] Anita A Disney, Chiye Aoki, and Michael J Hawken. Gain modulation by nicotine in macaque v1. *Neuron*,  
530 56(4):701–713, 2007.
- 531 [66] Zixiu Xiang, John R Huguenard, and David A Prince. Cholinergic switching within neocortical inhibitory  
532 networks. *Science*, 281(5379):985–988, 1998.
- 533 [67] Lucas Pinto, Michael J Goard, Daniel Estandian, Min Xu, Alex C Kwan, Seung-Hee Lee, Thomas C Har-  
534 rison, Guoping Feng, and Yang Dan. Fast modulation of visual perception by basal forebrain cholinergic  
535 neurons. *Nature neuroscience*, 16(12):1857–1863, 2013.
- 536 [68] Fangchen Zhu, Sarah Elmozahy, Jennifer Lawlor, and Kishore V Kuchibhotla. The cholinergic basal  
537 forebrain provides a parallel channel for state-dependent sensory signaling to auditory cortex. *Nature  
538 neuroscience*, pages 1–10, 2023.
- 539 [69] Pavel A Puzerey, Kamal Maher, Nikil Prasad, and Jesse H Goldberg. Vocal learning in songbirds requires  
540 cholinergic signaling in a motor cortex-like nucleus. *Journal of neurophysiology*, 120(4):1796–1806, 2018.
- 541 [70] Paul I Jaffe and Michael S Brainard. Acetylcholine acts on songbird premotor circuitry to invigorate vocal  
542 output. *Elife*, 9:e53288, 2020.
- 543 [71] Matthew Lovett-Barron, Aaron S Andalman, William E Allen, Sam Vesuna, Isaac Kauvar, Vanessa M  
544 Burns, and Karl Deisseroth. Ancestral circuits for the coordinated modulation of brain state. *Cell*,  
545 171(6):1411–1423, 2017.
- 546 [72] Jennifer J Coppola and Anita A Disney. Is there a canonical cortical circuit for the cholinergic system?  
547 anatomical differences across common model systems. *Frontiers in neural circuits*, 12:8, 2018.
- 548 [73] Anita A Disney and John H Reynolds. Expression of m1-type muscarinic acetylcholine receptors by  
549 parvalbumin-immunoreactive neurons in the primary visual cortex: A comparative study of rat, guinea  
550 pig, ferret, macaque, and human. *Journal of Comparative Neurology*, 522(5):986–1003, 2014.
- 551 [74] C Avendano, D Umbriaco, RW Dykes, and L Descarries. Acetylcholine innervation of sensory and motor  
552 neocortical areas in adult cat: a choline acetyltransferase immunohistochemical study. *Journal of chemical  
553 neuroanatomy*, 11(2):113–130, 1996.
- 554 [75] Xiangning Li, Bin Yu, Qingtao Sun, Yalun Zhang, Miao Ren, Xiaoyan Zhang, Anan Li, Jing Yuan, Linda  
555 Madisen, Qingming Luo, et al. Generation of a whole-brain atlas for the cholinergic system and meso-  
556 scopic projectome analysis of basal forebrain cholinergic neurons. *Proceedings of the National Academy of  
557 Sciences*, 115(2):415–420, 2018.
- 558 [76] Rogier B Poorthuis, Bernard Bloem, Benita Schak, Jordi Wester, Christiaan PJ de Kock, and Huib-  
559 ert D Mansvelder. Layer-specific modulation of the prefrontal cortex by nicotinic acetylcholine receptors.  
560 *Cerebral cortex*, 23(1):148–161, 2013.
- 561 [77] Joshua Obermayer, Matthijs B Verhoog, Antonio Luchicchi, and Huibert D Mansvelder. Cholinergic  
562 modulation of cortical microcircuits is layer-specific: evidence from rodent, monkey and human brain.  
563 *Frontiers in neural circuits*, 11:100, 2017.
- 564 [78] Oliver Hobert. Regulatory logic of neuronal diversity: terminal selector genes and selector motifs. *Pro-  
565 ceedings of the National Academy of Sciences*, 105(51):20067–20071, 2008.

- 566 [79] Detlev Arendt, Jacob M Musser, Clare VH Baker, Aviv Bergman, Connie Cepko, Douglas H Erwin,  
567 Mihaela Pavlicev, Gerhard Schlosser, Stefanie Widder, Manfred D Laubichler, et al. The origin and  
568 evolution of cell types. *Nature Reviews Genetics*, 17(12):744–757, 2016.
- 569 [80] Sarah Melzer and Hannah Monyer. Diversity and function of corticopetal and corticofugal gabaergic  
570 projection neurons. *Nature Reviews Neuroscience*, 21(9):499–515, 2020.
- 571 [81] Cathryn R Cadwell, Athanasia Palasantza, Xiaolong Jiang, Philipp Berens, Qiaolin Deng, Marlene Yilmaz,  
572 Jacob Reimer, Shan Shen, Matthias Bethge, Kimberley F Tolias, et al. Electrophysiological, transcriptomic  
573 and morphologic profiling of single neurons using patch-seq. *Nature biotechnology*, 34(2):199–203, 2016.
- 574 [82] Marcela Lipovsek, Cedric Bardy, Cathryn R Cadwell, Kristen Hadley, Dmitry Kobak, and Shreejoy J  
575 Tripathy. Patch-seq: Past, present, and future. *Journal of Neuroscience*, 41(5):937–946, 2021.
- 576 [83] P Ulinski. Visual cortex of turtles. *Evolution of Nervous Systems*, 2:195–203, 2007.
- 577 [84] Shreejoy J Tripathy, Lilah Toker, Brenna Li, Cindy-Lee Crichlow, Dmitry Tebaykin, B Ogan Mancarci,  
578 and Paul Pavlidis. Transcriptomic correlates of neuron electrophysiological diversity. *PLoS computational  
579 biology*, 13(10):e1005814, 2017.
- 580 [85] Yves Bernaerts, Michael Deistler, Pedro J Goncalves, Jonas Beck, Marcel Stimberg, Federico Scala, An-  
581 dreas S Tolias, Jakob H Macke, Dmitry Kobak, and Philipp Berens. Combined statistical-mechanistic  
582 modeling links ion channel genes to physiology of cortical neuron types. *bioRxiv*, pages 2023–03, 2023.
- 583 [86] Johannes Köster and Sven Rahmann. Snakemake—a scalable bioinformatics workflow engine. *Bioinfor-  
584 matics*, 28(19):2520–2522, 2012.
- 585 [87] Malte D Luecken and Fabian J Theis. Current best practices in single-cell rna-seq analysis: a tutorial.  
586 *Molecular systems biology*, 15(6):e8746, 2019.
- 587 [88] Constantin Ahlmann-Eltze and Wolfgang Huber. Comparison of transformations for single-cell rna-seq  
588 data. *Nature Methods*, pages 1–8, 2023.
- 589 [89] Christoph Hafemeister and Rahul Satija. Normalization and variance stabilization of single-cell rna-seq  
590 data using regularized negative binomial regression. *Genome biology*, 20(1):296, 2019.
- 591 [90] Jan Lause, Philipp Berens, and Dmitry Kobak. Analytic pearson residuals for normalization of single-cell  
592 rna-seq umi data. *Genome biology*, 22(1):1–20, 2021.
- 593 [91] Ake Björck and Gene H Golub. Numerical methods for computing angles between linear subspaces.  
594 *Mathematics of computation*, 27(123):579–594, 1973.
- 595 [92] Anaconda software distribution, 2020.
- 596 [93] Isaac Virshup, Sergei Rybakov, Fabian J Theis, Philipp Angerer, and F Alexander Wolf. anndata: Anno-  
597 tated data. *bioRxiv*, 2021.
- 598 [94] J. D. Hunter. Matplotlib: A 2d graphics environment. *Computing in Science & Engineering*, 9(3):90–95,  
599 2007.
- 600 [95] Charles R Harris, K Jarrod Millman, Stéfan J Van Der Walt, Ralf Gommers, Pauli Virtanen, David  
601 Cournapeau, Eric Wieser, Julian Taylor, Sebastian Berg, Nathaniel J Smith, et al. Array programming  
602 with numpy. *Nature*, 585(7825):357–362, 2020.
- 603 [96] The pandas development team. pandas-dev/pandas: Pandas, February 2020.
- 604 [97] Guido vanRossum. Python reference manual. *Department of Computer Science [CS]*, (R 9525), 1995.
- 605 [98] R Core Team. R: A language and environment for statistical computing. r foundation for statistical  
606 computing, vienna, austria. 2012, 2021.
- 607 [99] F Alexander Wolf, Philipp Angerer, and Fabian J Theis. Scanpy: large-scale single-cell gene expression  
608 data analysis. *Genome biology*, 19(1):1–5, 2018.
- 609 [100] F. Pedregosa, G. Varoquaux, A. Gramfort, V. Michel, B. Thirion, O. Grisel, M. Blondel, P. Prettenhofer,  
610 R. Weiss, V. Dubourg, J. Vanderplas, A. Passos, D. Cournapeau, M. Brucher, M. Perrot, and E. Duch-  
611 esnay. Scikit-learn: Machine learning in Python. *Journal of Machine Learning Research*, 12:2825–2830,  
612 2011.



- 613 [101] Pauli Virtanen, Ralf Gommers, Travis E. Oliphant, Matt Haberland, Tyler Reddy, David Cournapeau,  
614 Evgeni Burovski, Pearu Peterson, Warren Weckesser, Jonathan Bright, Stéfan J. van der Walt, Matthew  
615 Brett, Joshua Wilson, K. Jarrod Millman, Nikolay Mayorov, Andrew R. J. Nelson, Eric Jones, Robert  
616 Kern, Eric Larson, C J Carey, İlhan Polat, Yu Feng, Eric W. Moore, Jake VanderPlas, Denis Laxalde,  
617 Josef Perktold, Robert Cimrman, Ian Henriksen, E. A. Quintero, Charles R. Harris, Anne M. Archibald,  
618 Antônio H. Ribeiro, Fabian Pedregosa, Paul van Mulbregt, and SciPy 1.0 Contributors. SciPy 1.0:  
619 Fundamental Algorithms for Scientific Computing in Python. *Nature Methods*, 17:261–272, 2020.
- 620 [102] Michael L. Waskom. seaborn: statistical data visualization. *Journal of Open Source Software*, 6(60):3021,  
621 2021.
- 622 [103] Yuhan Hao, Stephanie Hao, Erica Andersen-Nissen, William M Mauck, Shiwei Zheng, Andrew Butler,  
623 Maddie J Lee, Aaron J Wilk, Charlotte Darby, Michael Zager, et al. Integrated analysis of multimodal  
624 single-cell data. *Cell*, 184(13):3573–3587, 2021.
- 625 [104] Skipper Seabold and Josef Perktold. statsmodels: Econometric and statistical modeling with python. In  
626 *9th Python in Science Conference*, 2010.

## 627 Supporting Material

### 628 Replication of Bugeon et al.

We validated our analysis pipeline by replicating the relevant results from Bugeon et al. [9] on their data. These data consist of in vivo neural activity and in situ gene expression of neurons from layers 1-3 of mouse primary visual cortex (*Mus musculus* VISp). Expression data was limited to a panel of 72 genes previously selected to identify interneuron subtypes [43]. The data also contain behavioural variables (e.g., running speed) that assign each time point to a “behavioural state”. Bugeon et al. distinguished three possible states: running (distinguished by a positive running speed), stationary desynchronized (zero running speed and little neural oscillations), and stationary synchronised (zero running speed and prominent neural oscillations). A neuron’s state modulation was defined as the normalised difference between its average activity during the most and least active state:

$$\frac{\text{running activity} - \text{synchronized activity}}{\text{running activity} + \text{synchronized activity}} \quad (4)$$

629 Neurons that are more active during running compared to baseline will therefore have a positive state modulation. In contrast, neurons that are less active during running will have a negative state modulation.

631 We selected high-quality cells following the criteria from Bugeon et al. ([9], see Methods), resulting in the  
632 same number of 1,065 inhibitory interneurons reported in their work. These interneurons are hierarchically  
633 distributed across 5 subclasses and 35 subtypes. State modulation could be computed for 872 neurons recorded  
634 during both running and synchronized states. As previously reported, visualising the neural activity during  
635 these states suggested differential state modulation between both cell classes and subtypes (Fig. S1a). We  
636 then computed each neuron’s state modulation based on its time-averaged activity (Equation (4)). Consistent  
637 with ref. [9], state modulation was negative for Pvalb (Pearson correlation -0.13), small and positive for Sst and  
638 Lamp5 (both 0.02), and strongly positive for Vip and Sncg interneurons (0.13 and 0.21, respectively) (Fig. S1b).

639 Next, we aimed to replicate the correlation between the first transcriptomic principal component (tPC1) and  
640 the state modulation. To compute tPC1, we first normalised and log-transformed the cell-by-gene expression  
641 matrix to correct for differences in sequencing depth and to stabilise the gene-count variances. We then applied  
642 principal component analysis to the transformed matrix. State modulation could indeed be predicted from  
643 tPC1 projections, both for subtypes (Fig. S1c, leave-one-out  $R^2 = 0.19$ ) and for individual neurons ( $R^2 = 0.17$ ).  
644 The predictive power of tPC1 is to some extent driven by between-subclass differences in gene expression [35]  
645 since it is relatively modest within individual subclasses (Fig. S2). Additional tPCs contained less information  
646 regarding state modulation: the second-best tPC (tPC29) achieved an  $R^2$  of 0.10 and explained only 0.9% of  
647 the variance, and tPC2 did not predict state modulation at all ( $R^2 = -0.01$ , Fig. S3). Together, the first 30  
648 tPCs improved upon tPC1 ( $R^2 = 0.60$ , 76.2% of total variance).

649 Finally, we verified the correlation between state modulation and cholinergic receptor expression that might  
650 reflect a mechanistic link between state modulation and transcriptome [9]. Since cholinergic receptor expression  
651 was not measured for the in vivo recorded neurons (the 72 gene panel did not include these receptors), its  
652 relationship with state modulation can only be tested using external expression values. Following ref. [9], we  
653 obtained these values from the publicly available data of Tasic et al. [6]. We preprocessed the raw count data  
654 like the Bugeon et al. expression matrix and selected the 35 upper-layer subtypes present in the in vivo data.  
655 We then computed the average receptor expression of each subtype and compared this with its average state



656 modulation. Linear regression showed that the expression of 5 out of 15 cholinergic receptors (or receptor  
657 subunits) could predict state modulation (Figs. S1d, S10). These consist of the 4 receptors shown by Bugeon  
658 et al. (Chrm3,4 and Chrna4,5, their Fig. 6b) and an additional nicotinic receptor (Chrna3).

659 We found one qualitative difference with previous results (Fig. 5c in ref. [9]), namely a clustering of tPC1  
660 scores into two groups corresponding to developmental origin [36]. This was caused by the log transformation  
661 used here but not in the original analyses (Fig. S3). The log transformation is a widely used preprocessing step  
662 in the analysis of count data [87, 88]. However, other transformations are also possible (see, e.g., [89, 90]). Here,  
663 it had only a minor effect on the quantitative relationship between tPC1 and state modulation (Fig. S3).

## 664 Network analysis

665 The cholinergic receptor densities in our simulations were chosen consistently with the transcriptomic and activ-  
666 ity data, but other choices are also possible, of course. We therefore investigated the effect of varying receptor  
667 densities using mathematical analyses. In particular, we asked for which receptor densities the cholinergic ef-  
668 fect might be different from that in the mouse. For example: does the lack of inhibitory receptors in human  
669 Pvalb cells imply that these cells are not inhibited during cholinergic modulation? And does the expression of  
670 inhibitory receptors by turtle Sst cells imply that these cells are actually inhibited?

In our simulations, all neurons receive net-positive inputs. Under these conditions, the network model contains only one nonlinearity: the rectification of dendritic activity that reaches the soma. The rectification is piecewise linear: if the dendrites are excited, the dendrites influence the soma ( $w_{ed} = 1$ ); if the dendrites are inhibited, the dendrite remains inactive and decouple from the soma ( $w_{ed} = 0$ ). The network dynamics are, therefore, governed by one of two connectivity matrices that only differ in the entry  $w_{ed}$ . Otherwise, the dynamics are linear:

$$\dot{\mathbf{r}} = -\mathbf{r} + W(w_{ed})\mathbf{r} + \mathbf{I}_0 + \mathbf{m}. \quad (5)$$

Here,  $\mathbf{m}$  is the vector modelling cholinergic modulation, and  $\mathbf{I}_0$  is the external input. For a given somato-dendritic coupling  $w_{ed}$  and cholinergic modulation  $\mathbf{m}$ , the steady state rates are found by solving  $\dot{\mathbf{r}} = 0$ :

$$\mathbf{r}(w_{ed}, \mathbf{m}) = [I - W(w_{ed})]^{-1}[\mathbf{I}_0 + \mathbf{m}] = A(w_{ed})[\mathbf{I}_0 + \mathbf{m}], \quad (6)$$

where we defined  $A(w_{ed}) = [I - W(w_{ed})]^{-1}$  as the matrix that maps inputs to steady-state rates:

$$A(w_{ed}) = \begin{pmatrix} 1 - w_{ee} & w_{ed} & -w_{ep} & 0 & 0 \\ w_{de} & 1 & 0 & -w_{ds} & 0 \\ w_{pe} & 0 & 1 + w_{pp} & -w_{ps} & 0 \\ w_{se} & 0 & 0 & 1 & -w_{sv} \\ w_{ve} & 0 & 0 & -w_{vs} & 1 \end{pmatrix}^{-1} \quad w_{ab} \geq 0 \quad \forall a, b. \quad (7)$$

671 Below, we will compute the relevant entries of  $A(w_{ed})$  up to its determinant, which is positive and therefore  
672 does not affect the entries' signs.

673 We use equation (6) to compute the modulatory effect on the network activity as the difference between the  
674 rates with and without modulation. We will consider the cases in which cholinergic modulation activates the  
675 dendrite that was silent without modulation (off→on) or inactivates the dendrite that was activated without  
676 ACh (on→off). The other two cases (on→on, off→on) can be derived analogously.

First, consider the case that modulation switches the dendrites off, as for the mouse and human circuits. The resulting change in network activity equals:

$$\Delta \mathbf{r} = \mathbf{r}(0, \mathbf{m}) - \mathbf{r}(1, \mathbf{0}) \quad (8)$$

$$= A(0)[\mathbf{I}_0 + \mathbf{m}] - A(1)[\mathbf{I}_0 + \mathbf{0}] \quad (9)$$

$$= A(0)\mathbf{m} + [A(0) - A(1)]\mathbf{I}_0. \quad (10)$$

In case that modulation switches the dendrites on, as for the turtle circuit, the resulting change in network activity equals:

$$\Delta \mathbf{r} = A(1)\mathbf{m} + [A(1) - A(0)]\mathbf{I}_0. \quad (11)$$

677 The first term in these equations is a linear combination of the receptor densities  $\mathbf{m} = (m_e, m_d, m_p, m_s, m_v)$ ,  
678 describing how the cholinergic modulation of individual populations propagates through the network. In our  
679 model, pyramidal cells do not express cholinergic receptors ( $m_e = m_d = 0$ ), such that the cholinergic effect is  
680 a linear combination of only the interneuron receptor densities. The second term in Eq. (11) is independent of  
681 the precise modulation and describes how the background input  $\mathbf{I}_0$  propagates through the network with and

without activated dendrites. Since this term is small, we ignore it in the following derivations, but it is shown in Fig. 5.

First, consider the cholinergic effect on Pvalb cells, which equals:

$$\Delta r_p = A_{pp}m_p + A_{ps}m_s + A_{pv}m_v. \quad (12)$$

Substituting the entries of  $A(0)$  gives:

$$\Delta r_p = A_{pp}m_p - A_{ps}(w_{sv} \cdot m_v - m_s) \quad (13)$$

$$= (1 - w_{ee}) \cdot (1 - w_{sv} \cdot w_{vs}) \cdot m_p + \quad (14)$$

$$w_{sv} \cdot (1 - w_{ee})(w_{ps} \cdot m_v - m_s). \quad (15)$$

An analogous equation describes  $\Delta r_s$  (see below). The lines in Figure 5 show  $\Delta r_p = 0$  and  $\Delta r_s = 0$  as a function of the Pvalb and Sst receptor densities  $m_p$  and  $m_s$ , for a fixed Vip density  $m_v$ . These boundaries delineate domains of positive and negative modulation of Pvalb and Sst interneurons.

So does the absence of inhibitory ACh receptors in human Pvalb cells (Fig. 4;  $m_p = 0$ ) imply that these cells will not be inhibited? Equation Eq. (13) shows that these cells will still be inhibited indirectly under the condition that:

$$\Delta r_p = w_{sv} \cdot (1 - w_{ee})(w_{ps} \cdot m_v - m_s) < 0. \quad (16)$$

The coefficient  $w_{sv} \cdot (1 - w_{ee})$  is positive, assuming the recurrent connectivity is not very strong ( $w_{ee} \leq 1$ ). Inhibition of Pvalb cells is then equivalent to

$$\Delta r_p < 0 \iff w_{ps} \cdot m_v - m_s < 0. \quad (17)$$

According to the expression data, Sst and Vip cells are positively modulated ( $m_s, m_v > 0$ ). Therefore, Pvalb cells will be inhibited by ACh as long as the inhibition from Ssts is stronger than the disinhibition from Vips. Under these conditions, the limited Chrm4 expression by human Pvalb cells is compatible with their inhibition.

Let us next consider the differential expression of inhibitory ACh receptors in Sst interneurons in turtles versus mammals. Intuitively, this is expected to cause a cholinergic suppression of Sst cells in the turtle, in contrast to the mouse. In the model, the cholinergic effect on Sst cells equals:

$$\Delta r_s = A_{sp}m_p + A_{ss}m_s + A_{sv}m_v. \quad (18)$$

Substituting the entries from  $A(1)$  gives:

$$\Delta r_s = A_{sp}m_p + A_{ss}(m_s - w_{sv} \cdot m_v) \quad (19)$$

$$= w_{ep} \cdot (w_{sv} \cdot w_{ve} - w_{se}) \cdot m_p + \quad (20)$$

$$[(1 - w_{ee} - w_{de})(1 + w_{pp}) + w_{ep} \cdot w_{pe}](m_s - w_{sv}m_v). \quad (21)$$

For the turtle circuit,  $m_p \leq 0$ , since Pvalb cells (weakly) express inhibitory ACh receptors. The first term will therefore be negative if  $w_{sv} \cdot w_{ve} - w_{se} > 0$ . Further,  $m_s < 0$  and  $m_v > 0$ , such that  $m_s - w_{sv}m_v < 0$ . The contribution of the second term will therefore be negative if:

$$(1 - w_{ee} - w_{de})(1 + w_{pp}) + w_{ep} \cdot w_{pe} > 0.$$

This will be the case unless recurrent excitation is very strong or the feedback loop between PCs and Pvalb cells is very weak. In summary, the expression of inhibitory ACh receptors by turtle Sst cells will indeed lead to their cholinergic inhibition, provided that the excitation onto Sst cells and the recurrent excitation are not too strong.

## Software

An Anaconda [92] environment with the appropriate software will be provided along with the code (Table 4).

| Software           | version |
|--------------------|---------|
| AnnData [93]       | 0.8.0   |
| Matplotlib [94]    | 3.6.2   |
| Numpy [95]         | 1.23.5  |
| Pandas [96]        | 1.5.2   |
| Python [97]        | 3.10.10 |
| R [98]             | 4.3.0   |
| Scanpy [99]        | 1.9.1   |
| Scikit-learn [100] | 1.2.1   |
| Scipy [101]        | 1.9.3   |
| Seaborn [102]      | 0.12.2  |
| Seurat [103]       | 4.0     |
| Snakemake [86]     | 7.8.2   |
| Statsmodels [104]  | 0.13.5  |

**Table 4:** Software versions.

697 **Supplementary figures**

**State modulation of interneurons can be predicted by first transcriptomic PC**

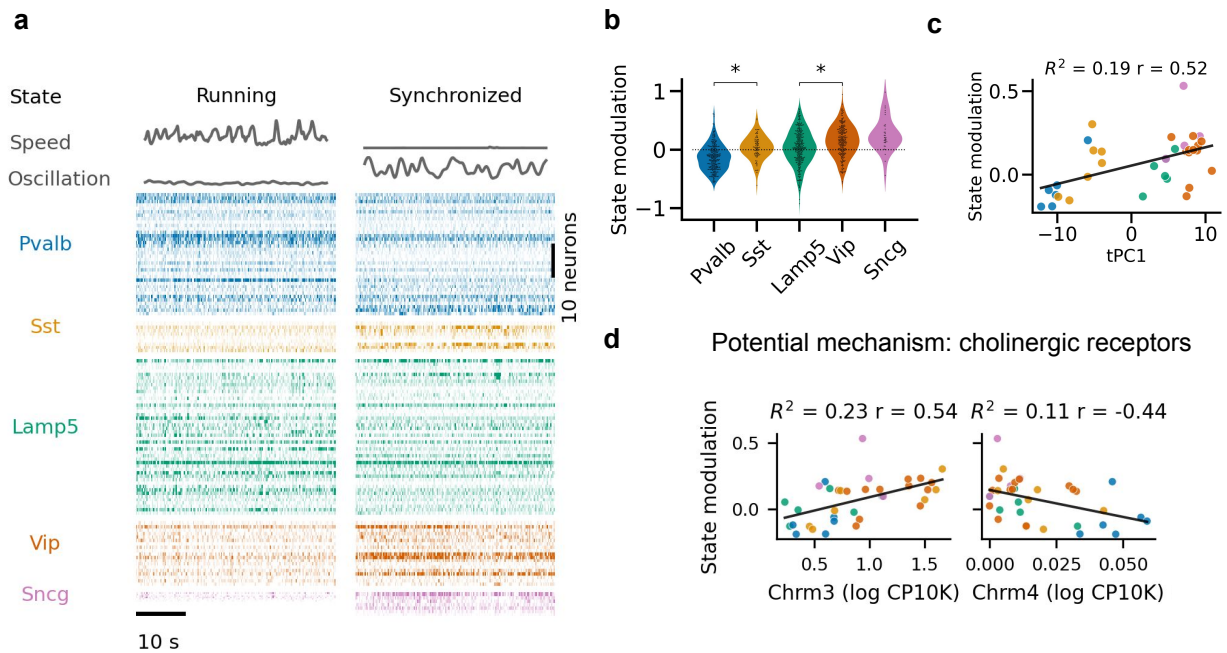

**Fig. S1: Replication of previous findings from Bugeon et al. [9]** (a) Neural activity systematically varies with behavioural state (measured by running speed and neural oscillations, see Methods) both between and within interneuron classes of mouse primary visual cortex (VISp) L1-3. (b) State modulation across all sessions for  $n = 872$  interneurons. Stars indicate statistically significant differences between subclasses ( $p < 0.05$ , Mann-Whitney U test). (c) The first transcriptomic principal component (tPC1) of the cell-by-gene matrix predicts state modulation of subtypes ( $n = 35$ ); Fig. S2a shows the relationship for individual cells.  $R^2$ , leave-one-out fraction of variance explained;  $r$ , Pearson correlation. Note the two clusters along tPC1, consisting of MGE-derived (Pvalb & Sst) and CGE-derived (Lamp5, Vip, Sncg) interneurons. (d) Cholinergic receptors potentially link a neuron's transcriptome and state modulation. For example, interneurons that overexpress the excitatory receptor Chrm3 are positively state-modulated ( $r = 0.54$ ;  $p = 0.0008$ ), those that overexpress the inhibitory cholinergic receptor Chrm4 are negatively state-modulated ( $r = -0.44$ ,  $p = 0.0075$ ). CP10K, counts per 10 thousand. Data and findings from Bugeon et al. [9]. Cholinergic receptor expression in (d) from Tasic et al. [6].

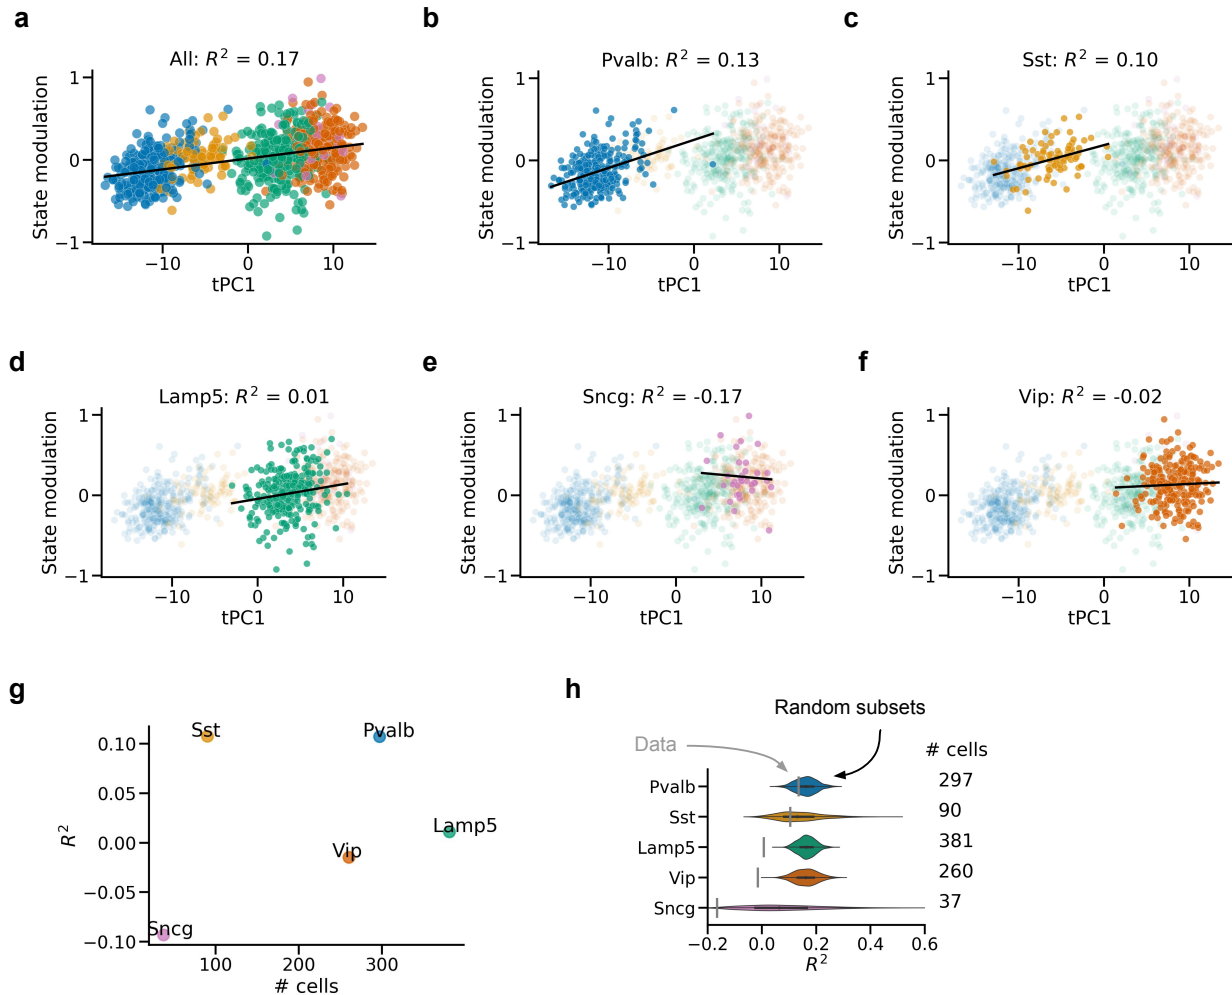

**Fig. S2: Predicting state modulation from tPC1.** Regression based on all cells (**a**) or cells from a single subclass (**b-f**). Predictive performance is worse for individual classes and only better than chance for Pvalb and Sst cells. The correlation between tPC1 and state modulation is therefore partially driven by between-subclass differences. However, tPC1 is still predictive of state modulation across all cells while controlling for subclass ( $p = 0.003$ , linear mixed model with subclass as random effect).  $R^2$ : leave-one-cell-out fraction of variance explained;  $R^2 < 0$  indicates a worse fit compared to predicting the same state modulation for each cell independent of tPC1 score. (**g,h**) Poor performance for certain subclasses is not due to a smaller sample size. (**g**) Sample size is not correlated with worse performance. (**h**) Size-matched subsets of all cells outperform below-chance subclasses, except for Sst cells. Grey bars:  $R^2$  values for each subclass. Violin plots: distribution of  $R^2$  values for 1000 random subsets of all cells with sample size matched to the subclass. Data from Bugeon et al. [9].

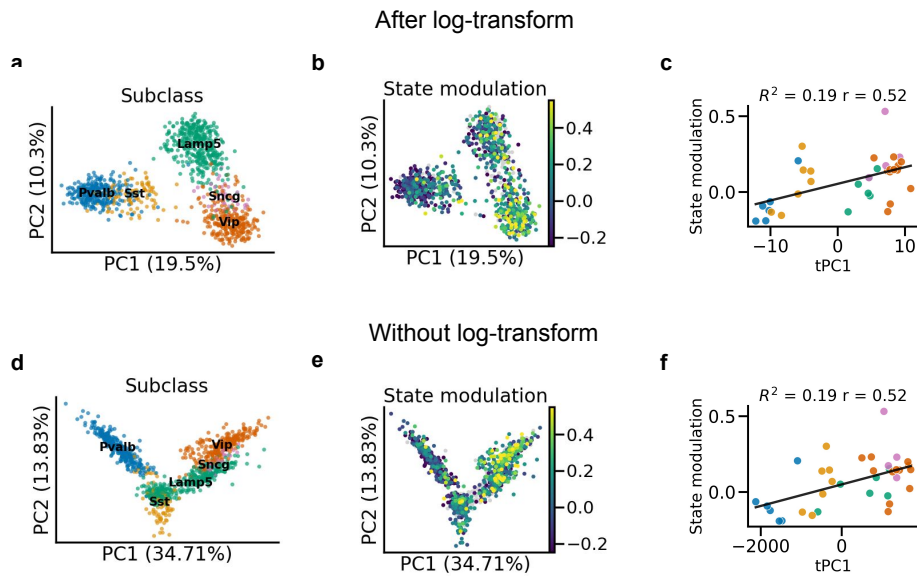

**Fig. S3: Log-transformation leads to clustering by developmental origin.** (a) First 2 transcriptomic principal components (tPCs) of the log-transformed count RNA data. (b) As (a), with colour indicating state modulation. (c) The first transcriptomic PC (tPC1) of log-transformed data predicts state modulation, replicated from Fig. S1c for comparison.  $R^2$ : leave-one-out fraction of variance explained,  $r$ : Pearson correlation. (d-f) As (a-c), but without log-transformation. Interneurons now form a continuum along tPC1, but the quantitative relationship between tPC1 and state modulation is preserved (up to 2 digits). Data from Bugeon et al. [9].

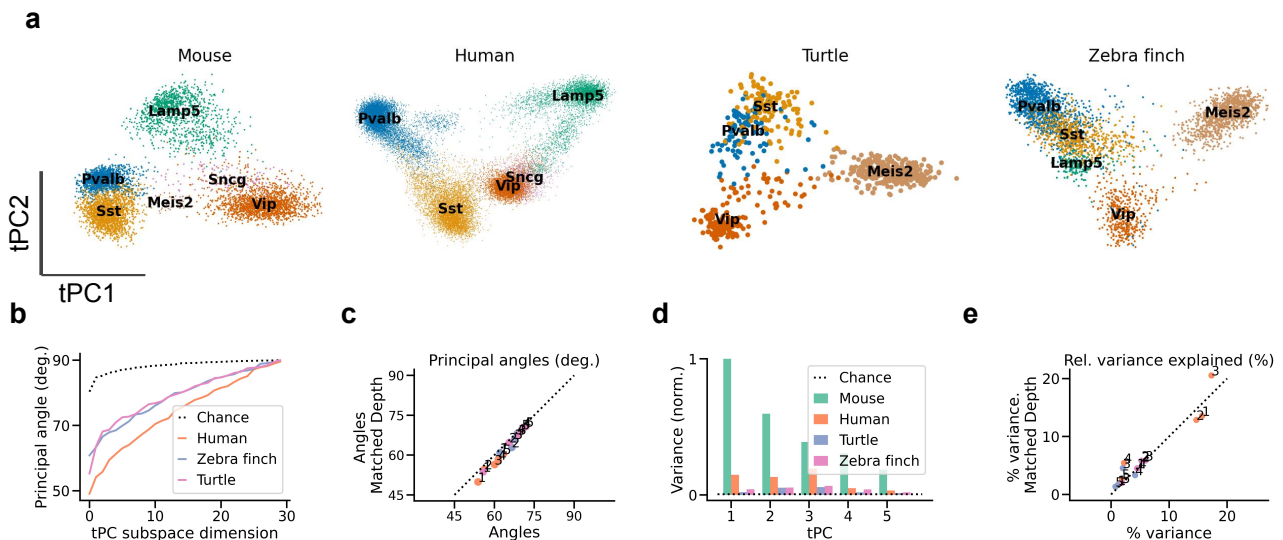

**Fig. S4: Transcriptomic PCs robust to sequencing depth.** (a) Projection of each dataset onto its first 2 transcriptomic PCs, after subsampling gene counts to the depth of the shallowest dataset (zebra finch, see Table 1). (b) Principal angles between tPC subspaces of subsampled data. (c) Comparison between angles of full-depth data and subsampled data. (d,e) As (b,c) but for variance explained. The human, turtle, and zebra finch tPC1 explain 14.0%, 1.2%, and 4.2% of the variance explained by mouse tPC1, respectively. Data from refs. [6] (mouse), [15] (human), [18] (turtle), [19] (zebra finch).



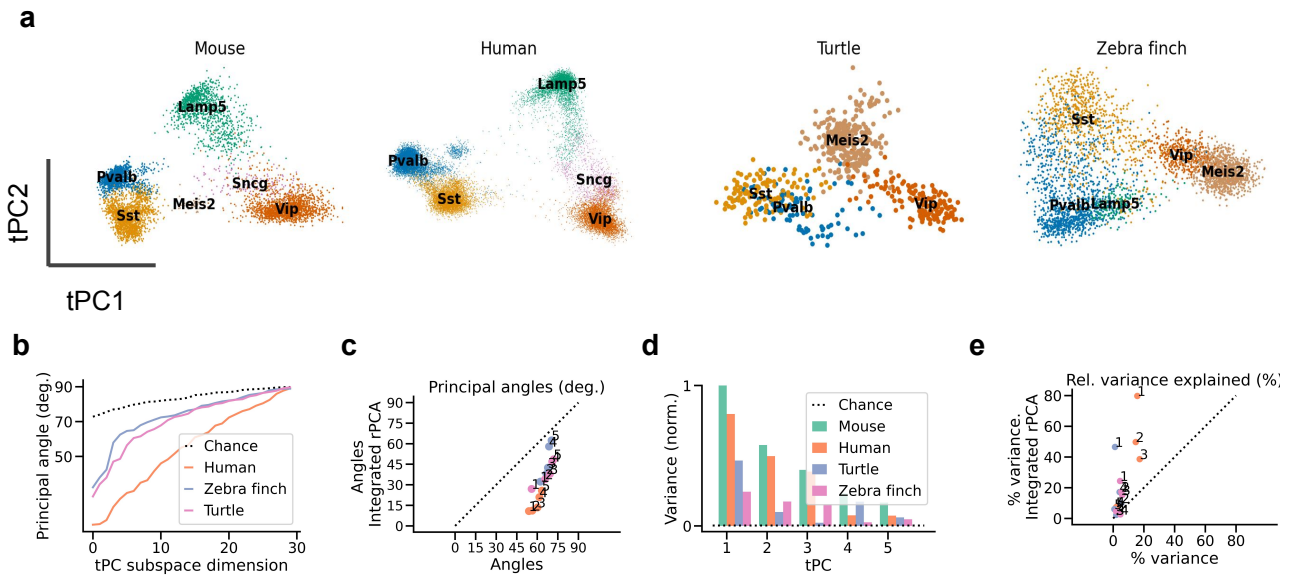

**Fig. S5: Computational integration increases similarity of mouse and human data.** (a) Projection of each dataset onto its first 2 transcriptomic PCs, after computational integration. Mouse and human datasets show increased similarity, but turtle cells no longer cluster by cell type (colour). (b) Principal angles between tPC subspaces computed after integration. (c) Comparison between angles computed without integration. Integration increased the similarity of all datasets, especially of the human data. (d,e) As (b,c) but for variance explained. The human, turtle, and zebra finch tPC1 explain 79.8%, 46.6%, and 24.4% of the variance explained by mouse tPC1, respectively. Data from refs. [6] (mouse), [15] (human), [18] (turtle), [19] (zebra finch).

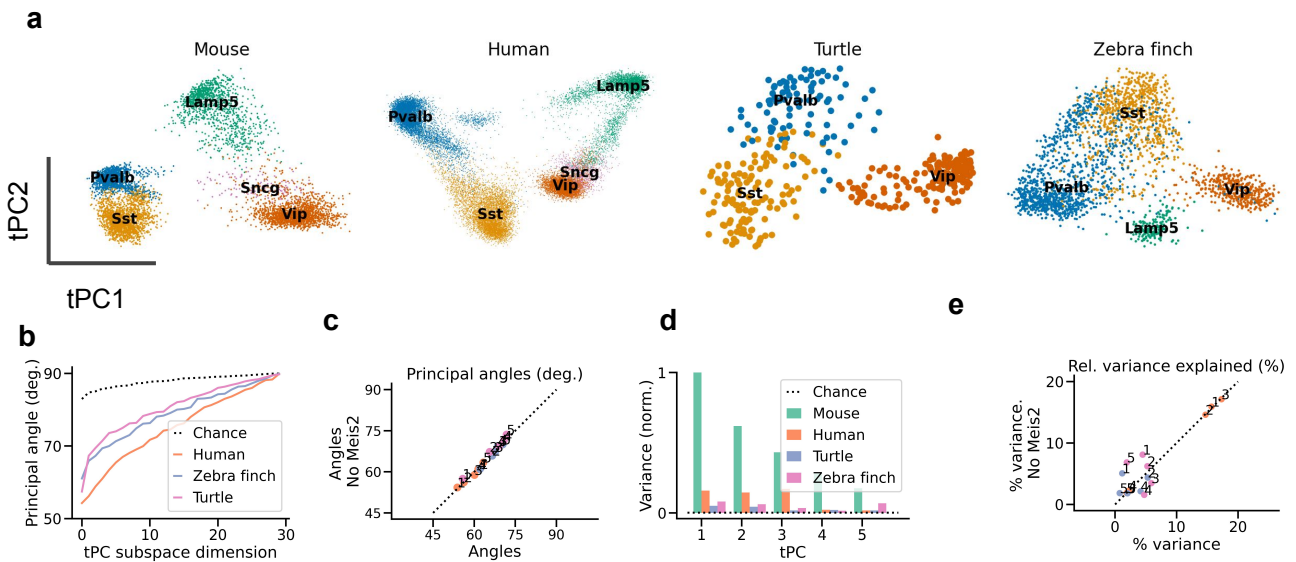

**Fig. S6: Differences in tPCs not due to Meis2 cells.** (a) Projection of each dataset onto its first 2 transcriptomic PCs, after removing Meis2 cells. (b) Principal angles between tPC subspaces computed without Meis2 cells. (c) Comparison between angles computed on all cells vs. cells without Meis2 population. (d,e) As (b,c) but for variance explained. The human, turtle, and zebra finch tPC1 explain 15.7%, 5.1%, and 8.1% of the variance explained by mouse tPC1, respectively. Data from refs. [6] (mouse), [15] (human), [18] (turtle), [19] (zebra finch).

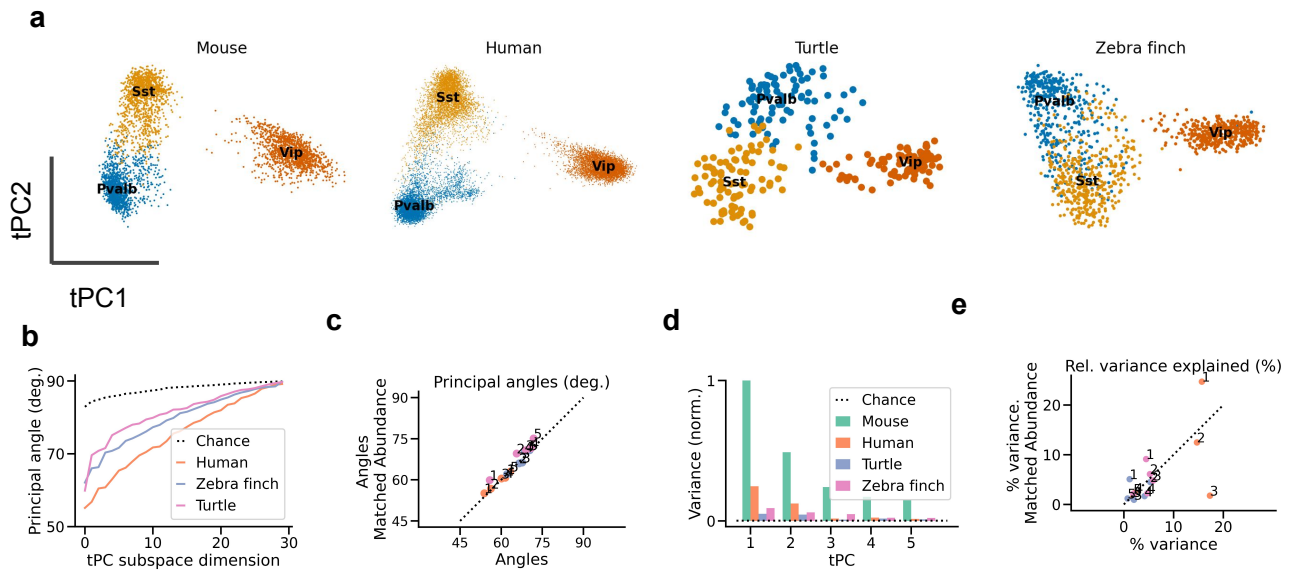

**Fig. S7: Differences in tPCs not only due to cell type abundance.** (a) Projection of each dataset onto its first 2 transcriptomic PCs, after matching cell type abundances (Fig. 2h). Principal angles between tPC subspaces. (c) Comparison between angles computed on all cells vs. cells after matching frequencies. (d,e) As (b,c) but for variance explained. The human, turtle, and zebra finch tPC1 explain 24.7%, 5.1%, and 9.2% of the variance explained by mouse tPC1, respectively. Data from refs. [6] (mouse), [15] (human), [18] (turtle), [19] (zebra finch).

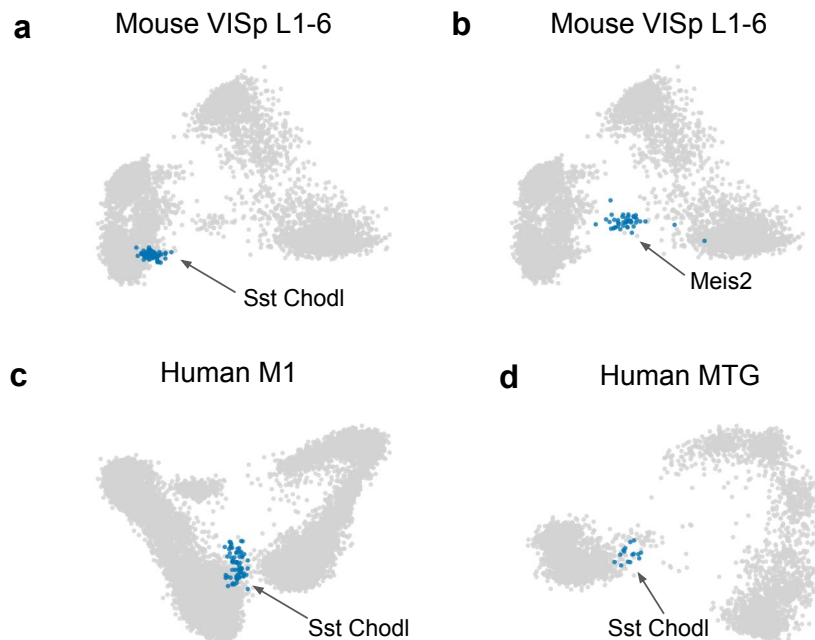

**Fig. S8: Intermediate tPC1 position of Chodl and Meis2 neurons.** Long range projecting Sst-Chodl (a) and white matter Meis2-Adamts19 cells (b) occupy an intermediate position along tPC1. (c,d) Sst Chodl neurons also have intermediate tPC1 scores in the human data. The human datasets do not contain Meis2 cells. Data from refs. [6] (a,b), [15] (c), and [14] (d).

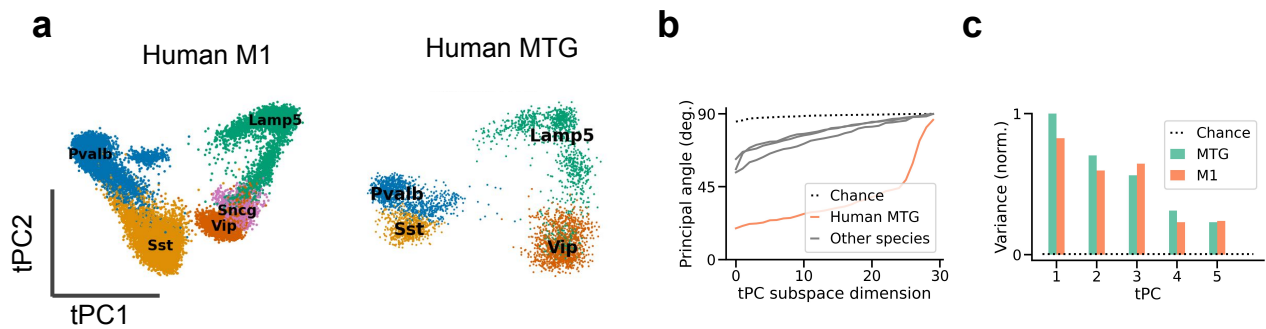

**Fig. S9: Small differences in PCs of human datasets.** (a) Projection of human datasets onto their first 2 tPCs. (b) Quantification of tPC similarity using principal angles between tPC subspaces of M1 and MTG data. (c) Quantification by variance explained in MTG data. The M1 tPC1 explains 82.6% of the MTG variance explained by the MTG tPC1. Data from refs. [15] and [14].

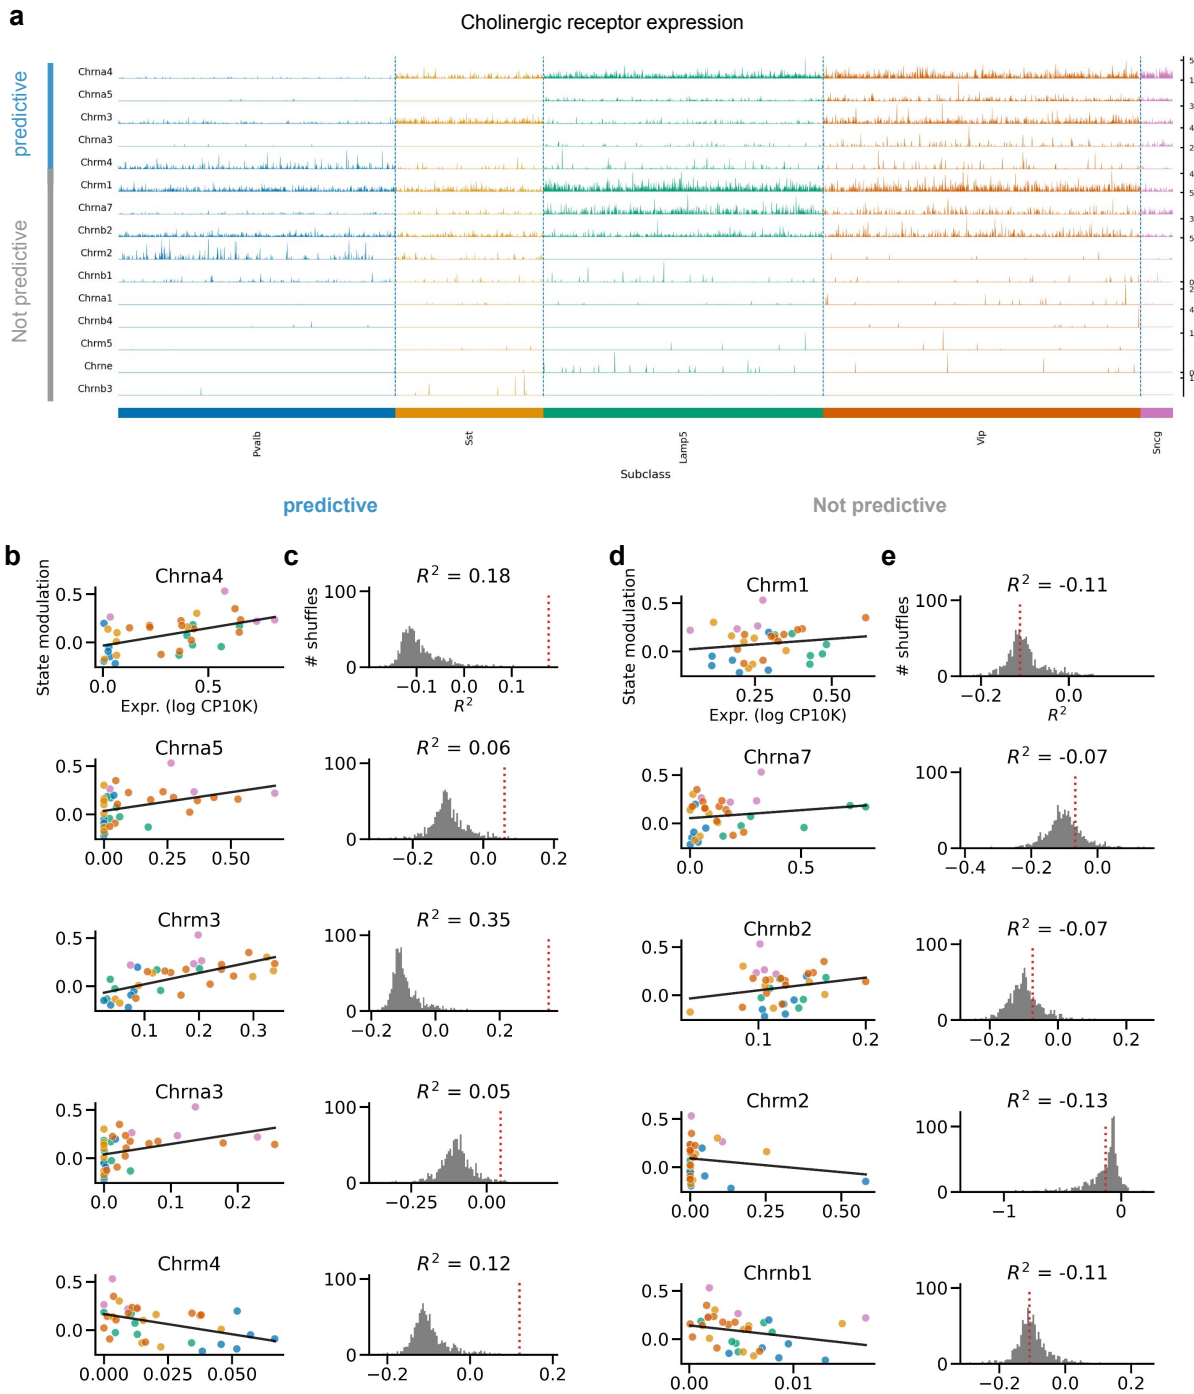

**Fig. S10: Predicting state modulation from cholinergic receptor expression.** (a) Tracks plot of cholinergic receptor (subunit) expression. The first 5 receptors predict state modulation; the remaining 10 do not (see b-e). Predictive and unresponsive receptors are independently sorted by expression based on expression levels. Shown are all receptors with an expression of at least 1 count per 10K. (b) Relationship between state modulation and log expression of receptors that are predictive of state modulation (1000 permutations,  $p < 0.05$ ). (c) Grey: Null distribution of leave-one-out  $R^2$  estimated by linear regression after permuting expression levels. Red:  $R^2$  without permutation. (d,e) As (b,c) but for the 5 unresponsive receptors with the highest expression. Receptor expression from Tasic et al. [6]; state modulation from Bugeon et al. [9].

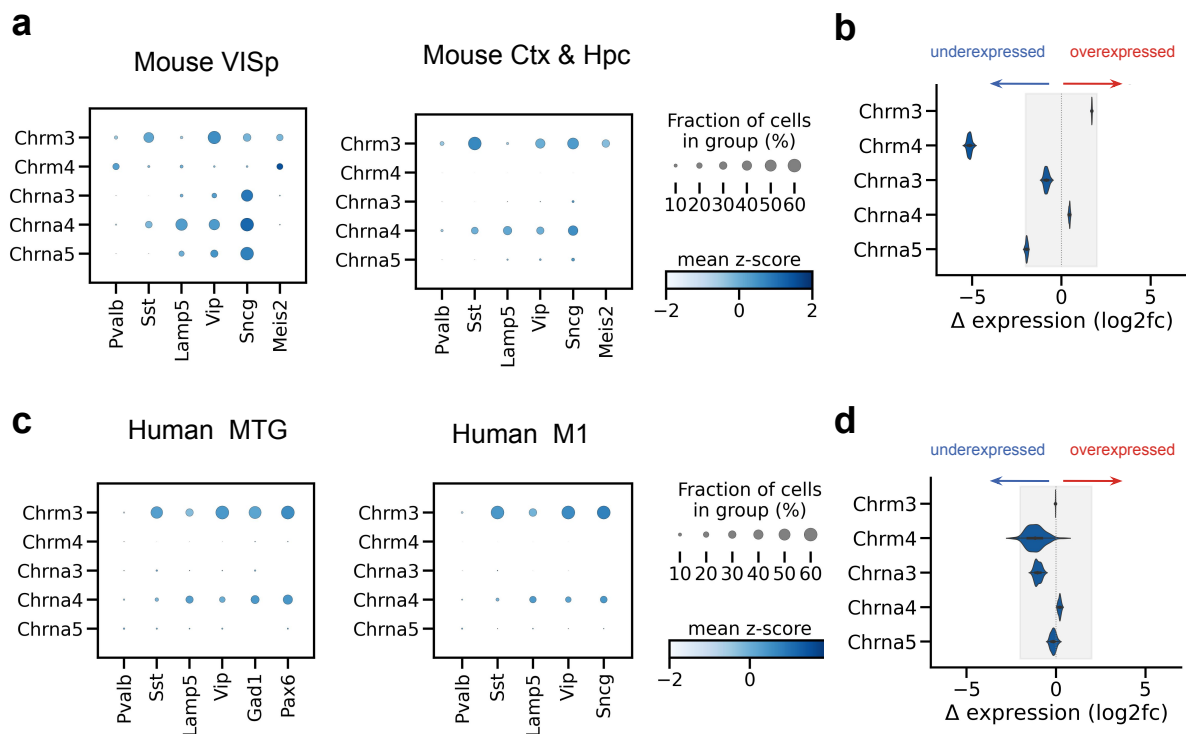

**Fig. S11: Mostly small within-species differences in ACh receptor expression.** (a) Dot plots showing the expression of the cholinergic receptors that predict state modulation in mouse VISp L1-3 (b) Log<sub>2</sub>-fold differences in expression after downsampling the VISp dataset to equal sequencing depth as the Ctx & Hpc data. Shaded area: log-fold difference of  $\pm 2$ , the range of most within-species differences. The exception is Chrm4, which is underexpressed in the Ctx & Hpc data compared to the VISp data. (c,d) As (a,b), but for human datasets. The MTG dataset was downsampled to match the M1 data. Data from refs. [6] (mouse VISp), [29] (mouse Ctx & Hc), [14] (human MTG), and [15] (human M1).
